## Decoding sequence-level information to predict membrane protein expression

Shyam M. Saladi<sup>1</sup>, Nauman Javed<sup>1</sup>, Axel Müller<sup>1</sup>, & William M. Clemons, Jr.<sup>1\*</sup>

<sup>1</sup>Division of Chemistry and Chemical Engineering, California Institute of Technology, Pasadena, CA

\*Corresponding author

Email: [clemons@caltech.edu](mailto:clemons@caltech.edu) (WMC)

## 1 Summary

2 The expression of integral membrane proteins (IMPs) remains a major bottleneck in the  
3 characterization of this important protein class. IMP expression levels are currently unpredictable, which  
4 renders the pursuit of IMPs for structural and biophysical characterization challenging and inefficient.  
5 Experimental evidence demonstrates that changes within the nucleotide or amino-acid sequence for a  
6 given IMP can dramatically affect expression; yet these observations have not resulted in generalizable  
7 approaches to improved expression. Here, we develop a data-driven statistical predictor named  
8 IMProve, that, using only sequence information, increases the likelihood of selecting an IMP that  
9 expresses in *E. coli*. The IMProve model, trained on experimental data, combines a set of sequence-  
10 derived features resulting in an IMProve score, where higher values have a higher probability of success.  
11 The model is rigorously validated against a variety of independent datasets that contain a wide range of  
12 experimental outcomes from various IMP expression trials. The results demonstrate that use of the  
13 model can more than double the number of successfully expressed targets at any experimental scale.  
14 IMProve can immediately be used to identify favorable targets for characterization.

## 15 Introduction

16 The biological importance of integral membrane proteins (IMPs) motivates structural and  
17 biophysical studies that require large amounts of purified protein at considerable cost. Only a small  
18 percentage can be produced at high-levels resulting in IMP structural characterization lagging far behind  
19 that of soluble proteins; IMPs currently constitute less than 2% of deposited atomic-level structures<sup>1</sup>. To  
20 increase the pace of structure determination, the scientific community created large government-funded  
21 structural genomics consortia facilities, like the NIH-funded New York Consortium on Membrane  
22 Protein Structure (NYCOMPS)<sup>2</sup>. For this representative example, more than 8000 genes, chosen based  
23 on characteristics hypothetically related to success, yielded only 600 (7.1%) highly expressing proteins<sup>3</sup>  
24 resulting to date in 34 (5.6% of expressed proteins) unique structures (based on annotation in the RCSB  
25 PDB<sup>4</sup>). This example highlights the funnel problem of structural biology, where each stage of the  
26 structure pipeline eliminates a large percentage of targets compounding into an overall low rate of  
27 success<sup>5</sup>. With new and rapidly advancing technologies like cryo-electron microscopy, serial  
28 femtosecond crystallography, and micro-electron diffraction, we expect that the latter half of the funnel,  
29 structure determination, will increase in success rate<sup>6-8</sup>. However, IMP expression will continue to limit  
30 targets accessible for study<sup>9</sup>.

31 Tools for improving the number of expressed IMPs are needed. While significant work has  
32 shown promise on a case-by-case basis, *e.g.* growth at lower temperatures, codon optimization<sup>10</sup>, and  
33 regulating transcription<sup>11</sup>, a generalizable solution remains elusive. Currently, each target must be  
34 addressed individually as the conditions that were successful for a previous target seldom carry over to  
35 other proteins, even amongst closely related homologs<sup>5,12</sup>. For individual cases, simple changes can  
36 have dramatic effects on the amount of expressed proteins<sup>13,14</sup>. Considering the scientific value of IMP  
37 studies, it is surprising that there are no methods that can provide solutions for improved expression  
38 outcomes with broad applicability across protein families and genomes.

39 There are currently no approaches available that can decode sequence-level information for  
40 predicting IMP expression; yet it is common knowledge that sequence changes which alter overall  
41 biophysical features of the protein and mRNA transcript can measurably influence IMP biogenesis.  
42 While physics-based approaches which have proven successful in correlating integration efficiency and

43 expression<sup>12,15</sup>, that and other work revealed that simple application of specific ‘sequence features’,  
44 such as the positive-inside rule, are inadequate to predict IMP expression<sup>16,17</sup>. For the positive-inside  
45 rule, as an example, this contrasts evidence that the number of positive-charges on cytoplasmic loops is  
46 known to be an important determinant of IMP biogenesis<sup>18,19</sup>. The reasons for this failure to connect  
47 sequence to expression likely lie in the complex underpinnings of IMP biogenesis, where the interplay  
48 between many sequence features at both the protein and nucleotide levels must be considered.  
49 Optimizing for a single sequence feature likely diminishes the beneficial effect of other features (e.g.  
50 increasing positive residues on internal loops might diminish favorable mRNA properties). Without  
51 accounting for the broad set of sequence features related to IMP expression, it is impossible to predict  
52 differences in expression.

53 Development of a low-cost, computational resource that significantly and reliably predicts  
54 improved expression outcomes would transform the study of IMPs. Attempts to develop such algorithms  
55 have so far failed. Several examples, Daley, von Heijne, and coworkers<sup>10,16,17</sup> as well as NYCOMPS,  
56 were unable to use experimental expression data sets to train models that returned any predictive  
57 performance (personal communication). This is not surprising, given the difficulty of expressing IMPs  
58 and the limits in the knowledge of the sequence features that drive expression. In other contexts,  
59 statistical tools based on sequence have been shown to work; for example, those developed to predict  
60 soluble protein expression and/or crystallization propensities<sup>20–22</sup>. Such predictors are primarily based  
61 on available experimental results from the Protein Structure Initiative<sup>23,24</sup>. While collectively these  
62 methods have supported significant advances in biochemistry, none of the models are able to predict  
63 IMP outcomes due to limitations inherent in the model development process. As IMPs have an  
64 extremely low success rate, they are either explicitly excluded from the training process or are implicitly  
65 down-weighted by the statistical model (for representative methodology see<sup>25</sup>). Consequently, none  
66 have successfully been able to map IMP expression to sequence.

67 Here, we demonstrate for the first time that it is possible to predict IMP expression directly from  
68 sequence. The resulting predictor allows one to enrich expression trials for proteins with a higher  
69 probability of success. To connect sequence to prediction, we develop a statistical model that maps a set  
70 of sequences to experimental expression levels via calculated features—thereby simultaneously  
71 accounting for the many potential determinants of expression. The resulting IMProve model allows  
72 ranking of any arbitrary set of IMP sequences in order of their relative likelihood of successful  
73 expression. The IMProve model is extensively validated against a variety of independent datasets  
74 demonstrating that it can be used broadly to predict the likelihood of expression in *E. coli* of any IMP.  
75 With IMProve, we have built a way for more than two-fold enrichment of positive expression outcomes  
76 relative to the rate attained from the current method of randomly selecting targets. We highlight how the  
77 model informs on the biological underpinnings that drive likely expression. Finally, we provide direct  
78 examples where the model can be used for a typical researcher. Our novel approach and the resulting  
79 IMProve model provide an exciting paradigm for connecting sequence space to complex experimental  
80 outcomes.

## 81 **Results**

82 For this study, we focus on heterologous expression in *E. coli*, due to its ubiquitous use as a tool  
83 for expression across the spectrum of the membrane proteome. For example, 43 of the 216 unique  
84 eukaryotic IMP structures were solved using protein expressed in *E. coli* (based on annotation in the  
85 RCSB PDB<sup>4</sup>). Low cost and low barriers for adoption highlight the utility of *E. coli* as a broad tool if  
86 the expression problem can be overcome.

## 87 Development of a computational model trained on *E. coli* expression data

88 A key component of any data-driven statistical model is the choice of dataset used for training.  
89 Having searched the literature, we identified two publications that contained quantitative datasets on the  
90 IPTG-induced overexpression of *E. coli* polytopic IMPs in *E. coli*. The first set, Daley, Rapp *et al.*,  
91 contained activity measures, proxies for expression level, from C-terminal tags of either GFP or PhoA  
92 (alkaline phosphatase)<sup>16</sup>. The second set, Fluman *et al.*, used a subset of constructs from the first and  
93 contained a more detailed analysis utilizing in-gel fluorescence to measure folded protein<sup>26</sup> (see  
94 Methods 4c). The expression results strongly correlated (Spearman's  $\rho = 0.73$ ) between the two datasets  
95 demonstrating that normalized GFP activity was a good measure of the amount of folded IMP (Fig. 1A  
96 and <sup>26,27</sup>). The experimental set-up employed multiple 96-well plates over multiple days resulting in  
97 pronounced variability in the absolute expression level of a given protein between trials. Daley, Rapp *et al.*  
98 *al.* calculated average expression levels by dividing the raw expression level of each protein by that of a  
99 control protein on the corresponding plate.

100 To successfully map sequence to expression, we additionally needed to derive numerical features  
101 from a given gene sequence that are empirically related to expression. Approximately 105 sequence  
102 features from protein and nucleotide sequence were calculated for each gene using custom code together  
103 with published software (codonW<sup>28</sup>, tAI<sup>29</sup>, NUPACK<sup>30</sup>, Vienna RNA<sup>31</sup>, Codon Pair Bias<sup>32</sup>, Disembl  
104 <sup>33</sup>, and RONN<sup>34</sup>). Relative metrics (*e.g.* codon adaptation index) are calculated with respect to the *E.*  
105 *coli* K-12 substr. MG1655<sup>35</sup> quantity. The octanol-water partitioning<sup>36</sup>, GES hydrophobicity<sup>37</sup>,  $\Delta G$  of  
106 insertion<sup>38</sup> scales were employed as well. Transmembrane segment topology was predicted using  
107 Phobius constrained for the training data and Phobius for all other datasets<sup>39</sup>. Two RNA secondary  
108 structure metrics were prompted in part by Goodman, *et al.*<sup>40</sup>. Supplementary Table 1 includes a  
109 detailed description of each feature. All features are calculated solely from the coding region of each  
110 gene of interest excluding other portions of the open reading frame and plasmid (*e.g.* linkers and tags, 5'  
111 untranslated region, copy number).

112 Fitting the data to a simple linear regression provides a facile method for deriving a weight for  
113 each feature. However, using the set of sequence features, we were unable to successfully fit a linear  
114 regression using the normalized GFP and PhoA measurements reported in the Daley, Rapp *et al.* study.  
115 Similarly, using the same feature set and data, we were unable to train a standard linear Support Vector  
116 Machine (SVM) to predict the expression data either averaged or across all plates (see Supplementary  
117 Table 1; Methods 2,3). Due to the attempts by others to fit this data, this outcome may not be surprising  
118 and suggested that a more complex analysis was required.

119 We hypothesized that training on relative measurements across the entire dataset introduced  
120 errors that were limiting. To address this, we instead only compare measurements within an individual  
121 plate, where differences between trials are less likely to introduce errors. To account for this, a  
122 preference-ranking linear SVM algorithm (SVM<sup>rank</sup><sup>41</sup>) was chosen (see Methods 4b). Simply put, the  
123 SVM<sup>rank</sup> algorithm determines the optimal weight for each sequence feature to best rank the order of  
124 expression outcomes within each plate over all plates, which results in a model where higher expressing  
125 proteins have higher scores. The outcome is identical in structure to a multiple linear regression, but  
126 instead of minimizing the sum of squared residuals, the SVM cost function accounts for the plate-wise  
127 constraint specified above. In practice, the process optimizes the correlation coefficient Kendall's  $\tau$  (Eq.  
128 1) to converge upon a set of weights.

$$\tau_{\text{kendall}} = \frac{\# \text{ correctly ordered pairs} - \# \text{ swapped pairs}}{\# \text{ total pairs}} \quad (1)$$

132 Various metrics summarize the accuracy with which the model fits the input data (Fig. 1B-E).  
133 The SVM<sup>rank</sup> training metric shows varying agreement for all groups (*i.e.*,  $\tau_{\text{kendall}} > 0$ ) (Fig. 1B). For  
134 individual genes, activity values normalized and averaged across trials were not directly used for the  
135 training procedure (see Methods 4a); yet one would anticipate that scores for each gene should broadly  
136 correlate with the expression average. Indeed, the observed normalized activities positively correlate  
137 with the score (dubbed IMProve score for Integral Membrane Protein expression improvement) output  
138 by the model (Fig. 1C,  $\rho > 0$ ). Since SVM<sup>rank</sup> transforms raw expression levels within each plate to ranks  
139 before training, there is no expectation or guarantee that magnitude differences in expression level  
140 manifest in magnitude differences in score. As a result, Spearman's  $\rho$ , a rank correlation coefficient  
141 describing the agreement between two ranked quantities, is better suited for quantifying correlation over  
142 more common metrics like the  $R^2$  of a regression and Pearson's  $r$ .

143 For a more quantitative approach to assessing the IMProve model's success within the training  
144 data, we turn to the Receiver Operating Characteristic (ROC). ROC curves quantify the tradeoff between  
145 true positive and false positive predictions across the numerical scores output from a predictor. This is a  
146 more reliable assessment of prediction than simply calculating accuracy and precision from a single,  
147 arbitrary score threshold<sup>42</sup>. The figure of merit that quantifies a ROC curve is the Area Under the Curve  
148 (AUC). Given that the AUC for a perfect predictor corresponds to 100% and that of a random predictor  
149 is 50% (Fig. 1D, grey dashed line), an AUC greater than 50% indicates predictive performance of the  
150 model (percentage signs hereafter omitted) (see Methods 5 and<sup>42</sup>). Here, the ROC framework will be  
151 used to quantitatively assess the ability of our model to predict the outcomes within the various datasets.

152 The training datasets are quantitative measures of activity requiring that an activity threshold be  
153 chosen that defines positive or negative outcomes. For example, ROC curves using two distinct activity  
154 thresholds, at the 25<sup>th</sup> or 75<sup>th</sup> percentile of highest expression, are plotted with their calculated AUC  
155 values (Fig. 1D). While both show that the model has predictive capacity, a more useful visualization  
156 would consider all possible activity thresholds. For this, the AUC value for every activity threshold is  
157 plotted showing that the model has predictive power regardless of an arbitrarily chosen expression  
158 threshold (Fig. 1E). In total, the analysis demonstrates that the model can rank expression outcomes  
159 across all proteins in the training set. Interestingly, for PhoA-tagged proteins the model is progressively  
160 less successful with increasing activity. The implications for this are discussed later (see Fig. 2G below).

## 161 **Demonstration of prediction against an independent large expression dataset**

162 While the above analyses show that the model successfully fits the training data, we assess the  
163 broader applicability of the model outside the training set based on its success at predicting the outcomes  
164 of independent expression trials from distinct groups and across varying scales. The first test considers  
165 results from NYCOMPS, where 8444 IMP genes entered expression trials, in up to eight conditions,  
166 resulting in 17114 expression outcomes (Fig. 2A)<sup>2</sup>. The majority of genes were attempted in only one  
167 condition (Fig. 2B), and, importantly, outcomes were non-quantitative (binary: expressed or not  
168 expressed) as indicated by the presence of a band by Coomassie staining of an SDS-PAGE gel after  
169 small-scale expression, solubilization, and nickel affinity purification<sup>3</sup>. For this analysis, the  
170 experimental results are either summarized as outcomes per gene or broken down as raw outcomes  
171 across defined expression conditions. For outcomes per gene, we can consider various thresholds for  
172 considering a gene as positive based on NYCOMPS expression success (Fig. 2B). The most stringent  
173 threshold only regards a gene as positive if it has no negative outcomes ("Only Positive", Fig. 2B, red).  
174 Since a well expressing gene would generally advance in the NYCOMPS pipeline without further small-  
175 scale expression trials, this positive group likely contains the best expressing proteins. A second



176 category comprises genes with at least one positive and at least one negative trial (“Mixed”, Fig. 2B,  
177 blue). These genes likely include proteins that are more difficult to express.

178 ROCs assess predictive power across these groups (Fig. 2C). IMProve scores markedly  
179 distinguish genes in the most stringent positive group (Only Positive) from all other genes (AUC = 67.1)  
180 (Fig. 2C red). A permissive threshold considering genes as positive with at least one positive trial (Only  
181 Positive plus Mixed genes) shows moderate predictive power (Fig. 2C pink, AUC = 59.7). If instead the  
182 Mixed genes are considered alone (excluding the Only Positive), the model very weakly distinguishes  
183 the mixed group from Only Negative genes (Fig. 2C dashed blue, AUC = 53.5). This likely supports the  
184 notion that this pool largely consists of more difficult-to-express genes. For further analysis of  
185 NYCOMPS, we focus on the Only Positive pool as this likely represents the pool of best expressing  
186 proteins.

187 The predictive power of the IMProve model can be assessed by a variety of additional metrics.  
188 This can be qualitatively visualized as a histogram of the IMProve scores for genes separated by  
189 expression success (Only Positive, red; Mixed, blue; Only Negative, grey) (Fig. 2D). Visually, the  
190 distribution of the scores for the Only Positive group is shifted to a higher score relative to the Only  
191 Negative and Mixed groups. The dramatic increase in the percentage of Only Positive genes as a  
192 function of increasing IMProve score (overlaid as a brown line) further emphasizes this. A major aim of  
193 this work is to enrich the likelihood of choosing positively expressing proteins. The positive predictive  
194 value (PPV, true positives ÷ predicted positives) becomes a useful metric for positive enrichment as it  
195 conveys the degree of improved prediction over the experimental baseline of the dataset. The PPV of the  
196 model is plotted as a function of the percentile of the IMProve score for the Only Positive group (Fig.  
197 2E). In the figure, the experimental baseline, all are predicted positive (PPV = 11.1%), is represented by  
198 a dashed line; therefore, a relative increase reflects the predictive power of the algorithm. For example,  
199 considering the top fourth of genes by IMProve score (75<sup>th</sup> percentile, IMProve score = -0.2, PPV =  
200 20%) shows that the algorithm increases the positive outcomes by 9% over baseline (1.82 fold change).  
201 Higher score cut-offs would have even higher increases in positive outcomes. For further illustration, we  
202 plot the fold-change in PPV across all thresholds (Fig. 2F).

203 We next confirm the ability of the IMProve model to predict within plasmids or sequence space  
204 distinct from those within the limited training set. For an overfit model, one might expect that only the  
205 subset of targets which most closely mirror the training data would show strong prediction. On the  
206 contrary, the model shows consistent performance throughout each of the eight distinct experimental  
207 conditions tested (Fig. 2G and Supplementary Table 2). One may also consider that the small size of the  
208 training set limited the number of protein folds sampled and, therefore, limited the number of folds that  
209 could be predicted by the model. To test this, we consider the performance of the model with regards to  
210 protein homology families, as defined by Pfam family classifications<sup>43</sup>. The 8444 genes in the  
211 NYCOMPS dataset fall into 555 Pfam families (~15% not classified). To understand whether the  
212 IMProve score is biased towards families present in the training set, we separate genes in the  
213 NYCOMPS dataset into either within the 153 Pfam families found in the training set or outside this pool  
214 (*i.e.* not in the training set). Satisfyingly, there is no significant difference in AUC at 95% confidence  
215 between these groups (68.2 versus 67.2) (Fig. 2H). Combined, this highlights that the model is not  
216 sensitive to the experimental design of the training set and predicts broadly across different vector  
217 backbones and protein folds.

218 The ability to predict the experimental data from NYCOMPS allows returning to the question of  
219 alkaline phosphatase as a metric for expression. For the training set, proteins with C-termini in the  
220 periplasm show less consistent fitting by the model (Fig. 1, orange). To assess the generality of this  
221 result, the NYCOMPS outcomes are split into pools for either cytoplasmic or periplasmic C-terminal

222 localization and AUCs are calculated for each. There are no significant differences in predictive capacity  
223 across all conditions (Fig. 2G, green vs. orange) irrespective of whether the tag is at the N- or C-  
224 terminus. This demonstrates that the IMProve model is applicable for all topologies.

225 At this point, it is useful to consider the potential improvement in the number of positive  
226 outcomes by using the IMProve model. NYCOMPS tested about a tenth of the 74 thousand possible  
227 IMPs from the 98 genomes of interest for expression<sup>2</sup>. Had NYCOMPS tested the same number of  
228 genes from this pool, but selected to have an IMProve score greater than 0.5 (at the 91<sup>st</sup> percentile (Fig.  
229 2D, yellow line)), they would have increased their positive pool of 934 by an additional 1207 proteins.  
230 This represents a more than two-fold improvement in the return on investment and is a clear benchmark  
231 of success for the IMProve model.

232

### 233 **Further demonstration of prediction against small-scale independent datasets**

234 The NYCOMPS example demonstrates the predictive power of the model across the broad range  
235 of sequence space encompassed by that dataset. Next, the performance of the model is tested against  
236 relevant subsets of sequence space (*e.g.* a family of proteins or the proteome from a single organism),  
237 which are reminiscent of laboratory-scale experiments that precede structural or biochemical analyses.  
238 While a number of datasets exist<sup>5,44-55</sup>, we identified seven for which complete sequence information  
239 could be obtained to calculate all the necessary sequence features<sup>44-50</sup>.

240 To understand the predictive performance within each of the small-scale datasets, we analyze the  
241 predictive performance of the model and highlight how the model could have been used to streamline  
242 those experiments. The clear predictive performance within the large-scale NYCOMPS dataset (Fig. 2)  
243 serves as a benchmark of expected performance at the scale of the experimental efforts for an individual  
244 lab (Fig. 3A). As targets within the various datasets were tested only one or a few times, experimental  
245 variability within each set could play a large-role on the outcomes noted. Therefore, we summarize  
246 positives within each dataset as those genes with the highest level of outcome as reported by the original  
247 authors as this outcome is likely most robust to such variability (*e.g.* seen via Coomassie Blue staining  
248 of an SDS-PAGE gel). To be complete, we have plotted and considered predictive performance across  
249 all possible outcomes as well (Fig. 3B-D, Supplementary Fig. 1).

250 The performance of the IMProve model for each of the small-scale datasets is consistent with  
251 that seen for the NYCOMPS dataset (Fig. 3A). This is most directly indicated by a mean AUC across all  
252 datasets of 65.6, highlighting the success across the varying scales. While the overall positive rate is  
253 different for each dataset, considering a cut-off in IMProve score, *e.g.* the top 50% or 10% of targets  
254 ranked by score, would have resulted in a greater percentage of positive outcomes. On average, ~70%  
255 of positives are captured within the top half of scores. Similarly, for the top 10% of scores, on average over  
256 20% of the positives are captured. Simply put, for one tenth of the work one would capture a significant  
257 number of the positive outcomes within the pool of targets in each dataset.

258 For broader consideration, one can consider the fold change in positive rate by selecting targets  
259 informed by IMProve scores. Using the data available, only testing proteins within the top 10% of scores  
260 would result in an average fold change of 2.0 in the positive rate (*i.e.* twice as many positively expressed  
261 proteins). As positive rate is a bounded quantity (maximum is 100%), the possible fold change is  
262 bounded as well and becomes relative to the overall positive rate when considering various cut-offs (*e.g.*  
263 for *T. maritima* the maximum fold-change is 15.4 while for archaeal transporters it is 3.3). Taking the  
264 average maximum possible fold change (7.5), the IMProve model achieves nearly a third of the possible  
265 improvement in positive rate compared to a perfect predictor.

266 Since IMProve model was trained on quantitative expression outcomes, we also expect that it  
267 captures quantitative trends in expression, *i.e.* a higher score translates to greater amount of expressed  
268 protein. While the NYCOMPS results are consistent with this (Fig. 2b), of the various data sets, only the  
269 expression of archaeal transporters presents quantitative expression outcomes for consideration. For this  
270 dataset, 14 archaeal transporters were chosen based on their homology to human proteins<sup>44</sup> and tested  
271 for expression in *E. coli*; total protein was quantified in the membrane fraction by Coomassie Blue  
272 staining of an SDS-PAGE gel. Here, the majority of the expressing proteins fall into the higher half of  
273 the IMProve scores, 7 out of 9 of those with multiple positive outcomes (Fig. 3B). Strikingly,  
274 quantification of the Coomassie Blue staining highlights a clear correlation with the IMProve score  
275 where the higher expressing proteins have higher scores (Fig. 3C).

276 A final test considers the ability of the model to predict expression in hosts other than *E. coli*.  
277 The expression trials of 101 mammalian GPCRs in bacterial and eukaryotic systems<sup>47</sup> provides a data  
278 set for considering this question. For this experiment, trials in *E. coli* clearly follow the trend that  
279 IMProve can predict within this group of mammalian proteins (AUC = 77.7) (Fig. 3A & Supplementary  
280 Fig. 1A,B). However, the expression of the same set of proteins in *P. pastoris* fails to show any  
281 predictive performance (AUC = 54.8) (Supplementary Fig. 1A,B). This lack of predictive performance  
282 in *P. pastoris* suggests that the parameterization of the model, calibrated for *E. coli* expression, requires  
283 retraining to generate a different model that captures the distinct interplay of sequence parameters in  
284 other hosts.

## 285 **Biological importance of various sequence features**

286 Considering the success of IMProve, one might anticipate that biological properties driving  
287 prediction may provide insight into IMP biogenesis and expression. Using a proof-of-concept linear  
288 model allowed for a straightforward and useful predictor. With a linear model, as employed here,  
289 extracting the importance of each feature is ordinarily straightforward; assuming features are distributed  
290 identically and independently (“i.i.d.”), the weight assigned to each feature should correspond to its  
291 relative importance. However, in our case, the input features do not satisfy these conditions and  
292 significant correlation exists between individual features (Supplementary Fig. 2). As a result, during the  
293 training procedure, unequal weight is placed across correlating features that represent the same  
294 underlying biological property, thereby, complicating the process of determining the biological  
295 underpinnings of the IMProve score. For example, the importance of transmembrane segment  
296 hydrophobicity for membrane partitioning is distributed between several features: among these the  
297 average  $\Delta G_{\text{insertion}}$ <sup>38</sup> of TM segments has a positive weight whereas average hydrophobicity, a  
298 correlating feature, has a negative weight (Supplementary Table 1, Supplementary Fig. 2). As many  
299 features are correlated; conclusive information cannot be obtained simply using weights of individual  
300 features to interpret the relative importance of their underlying biological phenomena. We address this  
301 complication by coarsening our view of the features to two levels: First, we analyze features derived  
302 from protein versus those derived from nucleotide sequence, and then we look more closely at features  
303 groups after categorizing by biological phenomena.

304 The coarsest view of the features is a comparison of those derived from protein sequence versus  
305 those derived from nucleotide sequence. The summed weight for protein features is around zero,  
306 whereas for nucleotide features the summed weight is slightly positive suggesting that in comparison  
307 these features may be more important to the predictive performance of the model (Fig. 4A). Within the  
308 training set, protein features more completely explain the score both via correlation coefficients (Fig.  
309 4B) as well as through ROC analysis (Fig. 4C). However, comparison of the predictive performance of  
310 the two subsets of weights shows that the nucleotide features alone can give similar performance to the



311 full model for the NYCOMPS dataset (Fig. 4D). Within the small-scale datasets investigated, using only  
312 protein or nucleotide features shows no significant difference in predictive power at 95% confidence  
313 (Fig. 4E). In general, this suggests that neither protein nor nucleotide features are uniquely important for  
314 IMP expression. However, within the context of the trained model, nucleotide features are critical for  
315 predictive performance for a large and diverse dataset such as NYCOMPS. This finding corroborates  
316 growing literature that the nucleotide sequence holds significant determinants of biological processes  
317 <sup>40,26,56–58</sup>.

318 We next collapse conceptually similar features into biological categories that allow us to infer  
319 the phenomena that drive prediction. Categories are chosen empirically (*e.g.* the hydrophobicity group  
320 incorporates sequence features such as average hydrophobicity, maximum hydrophobicity,  $\Delta G_{\text{insertion}}$ ,  
321 *etc.*), which results in a reduction in overall correlation (Supplementary Fig. 3A). The full category list is  
322 provided in Supplementary Table 1. To visualize the importance of each category, the collapsed weights  
323 are summarized in Supplementary Fig. 3B, where each bar contains individual feature weights within a  
324 category. Features with a negative weight are stacked to the left of zero and those with a positive weight  
325 are stacked to the right. A red dot represents the sum of all weights, and the length of the bar gives the  
326 total absolute value of the combined weights within a category. Ranking the categories based on the sum  
327 of their weight suggests that some categories play a more prominent role than others. These include  
328 properties related to transmembrane segments (hydrophobicity and TM size/count), codon pair score,  
329 loop length, and overall length/pI.

330 To explore the role of each biological category in prediction, the performance of the model is  
331 assessed using only features within a given category. First, the strength of the correlation coefficients for  
332 given categories within the training set suggests the relative utility of each category for prediction.  
333 (Supplementary Fig. 3C, as in Fig. 4B). Examples of categories with high correlation coefficients are 5'  
334 Codon Usage, Length/pI, Loop Length, and SD-like Sites. To verify their importance for prediction, we  
335 consider the AUC for prediction using each feature category for the NYCOMPS dataset (Supplementary  
336 Fig. 3D). In this analysis, only Length/pI shows some predictive power. Overall, the analysis of the  
337 training and large-scale testing dataset shows that no feature category independently drives the predictor.  
338 Excluding each individually does not significantly affect the overall predictive performance, except for  
339 Length/pI (data not shown). Sequence length composes the majority of the weight within this category  
340 and is one of the highest weighted features in the model (Supplementary Fig. 3A). This is consistent  
341 with the anecdotal observation that larger IMPs are typically harder to express. However, this parameter  
342 alone would not be useful for predicting within a smaller subset, like a single protein family, where there  
343 is little variance in length (*e.g.* Fig. 3,5). One might develop a predictor that was better for a given  
344 protein family under certain conditions with a subset of the entire features considered here; yet this  
345 would require *a priori* knowledge of the system, *i.e.* which sequence features were truly most important,  
346 and would preclude broad generalizability as shown for the IMProve model.

347

### 348 **Usage of the IMProve model for IMP expression**

349 We illustrate the IMProve model's ability to identify promising homologs within a protein  
350 family by considering subsets of the broad range of targets tested by NYCOMPS. First, we consider two  
351 examples for protein families that do not have associated atomic resolution structures: copper resistance  
352 proteins (CopD, PF05425) and short-chain fatty-acid transporters (AtoE, PF02667). In the first two rows  
353 of Fig. 5A, genes from the two families are plotted by IMProve score and colored by experimental  
354 outcome. In both cases, as indicated by the AUCs of 88.2 and 80.7 (Fig. 5A), the model excels at  
355 predicting these families and provides a clear score cut-off to guide target selection for future expression

356 experiments. For example, we expect that CopD homologs with IMProve scores above -1 will have a  
357 higher likelihood of expressing over other homologs.

358 We have calculated predictive performance for each Pfam found in the NYCOMPS data which  
359 allows us to provide considerations for future experiments (Supplementary Table 3). In particular, we  
360 highlight three families with many genes tested, multiple experimental trials and a spread of outcomes:  
361 voltage-dependent anion channels (PF03595), Na/H exchangers (PF00999), and glycosyltransferases  
362 (PF00535). For these, a very clear IMProve score cut-off emerges from the experimental outcomes  
363 (dashed line in Fig. 5A). Strikingly, for these families the IMProve model clearly ranks the targets with  
364 Only Positive outcomes (red) at higher scores, again suggesting a preference for the best expressing  
365 proteins (see Fig. 2 and 3). Similarly, many more families within NYCOMPS are predicted with high  
366 statistical confidence (Supplementary Table 3); we provide a subset as Fig. 5B. For these, if only genes  
367 in the top 50% of IMProve score were tested, 81% of the total positives would be captured. As noted  
368 before, this is a dramatic increase in efficiency. Excitingly, many of these families remain to be resolved  
369 structurally. Considering these results with the broader experimental data sets (Fig. 3), no matter the  
370 number of proteins one is willing to test, the IMProve model enables selecting targets with a high  
371 probability of expression success in *E. coli*.

## 372 **Sequence optimization for expression**

373 The predictive performance of the model implies that the features defined here provide a coarse  
374 approximation of the fitness landscape for IMP expression. Attempting to optimize a single feature by  
375 modifying the sequence will likely affect the resulting score and expression due to changes in other  
376 features. Fluman, *et al.* provides an illustrative experiment<sup>26</sup>. For that work, it was hypothesized that  
377 altering the number of Shine-Dalgarno (SD)-like sites in the coding sequence of a IMP would affect  
378 expression. To test this, silent mutations were engineered within the first 200 bases of three proteins  
379 (genes *ygdD*, *brnQ*, and *ybjJ* from *E. coli*) to increase the number of SD-like sites with the goal of  
380 improving expression. Expression trials demonstrated that only one of the proteins (BrnQ) had improved  
381 expression of folded protein. While the number of SD-like sites alone does not correlate, only 1 out of 3,  
382 the resulting changes in the IMProve score correlate with the changes in measured expression, 3 out of 3  
383 (Fig. 5C). The IMProve model's ability to capture the outcomes in this small test case illustrates the  
384 utility of integrating the contribution of the numerous parameters involved in IMP biogenesis.

## 385 **Discussion**

386 Here, we have demonstrated a statistically driven predictor, IMProve, that decodes from  
387 sequence the sum of biological features that drive expression, a feat not previously possible<sup>10,17</sup>. The  
388 current best practice for characterization of an IMP target begins with the identification and testing of  
389 multiple homologs or variants for expression. The predictive power of IMProve enables this by  
390 providing a low barrier-to-entry method to enrich more than two-fold the positive outcomes from such  
391 expression. IMProve allows for the prioritization of targets to test for expression making more optimal  
392 use of limited human and material resources. For groups with small scale projects such as individual  
393 labs, this means that for the same cost one would double the success rate. For large scale groups, such as  
394 companies or consortia, IMProve can reduce by half the cost required to obtain the same number of  
395 positive results. We provide the current predictor as a web service where scores can be calculated, and  
396 the method, associated data, and suggested analyses are publically available to catalyze progress across  
397 the community ([clemonslab.caltech.edu](http://clemonslab.caltech.edu)).

398 Having shown that IMP expression can be predicted, the generalizability of the model is  
399 remarkable despite several known limitations. Using data from a single study for training precludes  
400 including certain variables that empirically influence expression such as the features corresponding to  
401 fusion tags and the context of the protein in an expression plasmid, *e.g.* the 5' untranslated region, for  
402 which there was no variation in the Daley, Rapp, *et al.* dataset. Moreover, using a simple proof-of-  
403 concept linear model allowed for a straightforward and robust predictor; however, intrinsically it cannot  
404 be directly related to the biological underpinnings. While we can extract some biological inference, a  
405 linear combination of sequence features does not explicitly reflect the reality of physical limits for host  
406 cells. To some extent, constraint information is likely encoded in the complex architecture of the  
407 underlying sequence space (*e.g.* through the genetic code, TM prediction, RNA secondary structure  
408 analyses). Future statistical models that improve on these limitations will likely hone predictive power  
409 and more intricately characterize the interplay of variables that underlie IMP expression in *E. coli* and  
410 other systems.

411 A perhaps surprising outcome of our results is the demonstration of the quantitatively important  
412 contribution of the nucleotide sequence as a component of the IMProve score. This echoes the growing  
413 literature that aspects of the nucleotide sequence are important determinants of protein biogenesis in  
414 general<sup>40,26,56–58</sup>. While one expects that there may be different weights for various nucleotide derived  
415 features between soluble and IMPs, it is likely that these features are important for soluble proteins as  
416 well. An example of this is the importance of codon optimization for soluble protein expression, which  
417 has failed to show any general benefit for IMPs<sup>10</sup>. Current expression predictors that have predictive  
418 power for soluble proteins have only used protein sequence for deriving the underlying feature set<sup>59,60</sup>.  
419 Future prediction methods will likely benefit from including nucleotide sequence features as done here.

420 The ability to predict phenotypic results using sequence based statistical models opens a variety  
421 of opportunities. As done here, this requires a careful understanding of the system and its underlying  
422 biological processes enumerated in a multitude of individual variables that impact the stated goal of the  
423 predictor, in this case enriching protein expression. As new features related to expression are discovered,  
424 future work will incorporate these leading to improved models. This can include features derived from  
425 other approaches such as the integration efficiency derived from coarse-grained molecular dynamics  
426<sup>12,15</sup>. Based on these results, expanding to new expression hosts such as eukaryotes seems entirely  
427 feasible, although a number of new features may need to be considered, *e.g.* glycosylation sites and  
428 trafficking signals. Moreover, the ability to score proteins for expressibility creates new avenues to  
429 computationally engineer IMPs for expression. The proof-of-concept described here required significant  
430 work to compile data from genomics consortia and the literature in a readily useable form. As data  
431 becomes more easily accessible, broadly leveraging diverse experimental outcomes to decode sequence-  
432 level information, an extension of this work, is anticipated.

## 433 **Author Contributions**

434 S.M.S., A.M., and W.M.C. conceived the project. S.M.S. developed the approach. S.M.S., A.M.,  
435 and N.J. compiled sequence and experimental data. N.J. created code to demonstrate feasibility. S.M.S.  
436 performed all published calculations. S.M.S. and W.M.C. wrote the manuscript.

## 437 **Acknowledgements**

438 We thank Daniel Daley and Thomas Miller's group for discussion, Yaser Abu-Mostafa and  
439 Yisong Yue for guidance regarding machine learning, Niles Pierce for providing NUPACK source code  
440 <sup>30</sup>, Welison Floriano and Naveed Near-Ansari for maintaining local computing resources, and Samuel  
441 Schulte for suggesting the model's name. We thank Michiel Niesen, Stephen Marshall, Thomas Miller,  
442 Reid van Lehn, James Bowie, and Tom Rapoport for comments on the manuscript. Models and analyses  
443 are possible thanks to raw experimental data provided by Daniel Daley and Mikaela Rapp <sup>16</sup>; Nir  
444 Fluman <sup>26</sup>; Edda Kloppmann, Brian Kloss, and Marco Punta from NYCOMPS <sup>2,3</sup>; Pikyee Ma <sup>44</sup>; Renaud  
445 Wagner <sup>47</sup>; Florent Bernaudat <sup>51</sup>, and Constance Jeffrey <sup>45</sup>.

446 We acknowledge funding from an NIH Pioneer Award to WMC (5DP1GM105385); a Benjamin  
447 M. Rosen graduate fellowship, a NIH/NRSA training grant (5T32GM07616), and a NSF Graduate  
448 Research fellowship to SMS; and an Arthur A. Noyes Summer Undergraduate Research Fellowship to  
449 NJ. Computational time was provided by Stephen Mayo and Douglas Rees. This material is based upon  
450 work supported by the National Science Foundation Graduate Research Fellowship Program under  
451 Grant No. 1144469. Any opinions, findings, and conclusions or recommendations expressed in this  
452 material are those of the authors and do not necessarily reflect the views of the National Science  
453 Foundation. This work used the Extreme Science and Engineering Discovery Environment (XSEDE),  
454 which is supported by National Science Foundation grant number ACI-1053575 <sup>61</sup>.

## 455 Online Methods

456 Sequence mapping & retrieval and feature calculation was performed in Python 2.7<sup>62</sup> using  
457 BioPython<sup>63</sup> and NumPy<sup>64</sup>; executed and consolidated using Bash (shell) scripts; and parallelized  
458 where possible using GNU Parallel<sup>65</sup>. Data analysis and presentation was done in R<sup>66</sup> within RStudio<sup>67</sup>  
459 using magrittr<sup>68</sup>, plyr<sup>69</sup>, dplyr<sup>70</sup>, asbio<sup>71</sup>, and datamart<sup>72</sup> for data handling; ggplot2<sup>73</sup>, ggbeeswarm<sup>74</sup>,  
460 GGally<sup>75</sup>, gridExtra<sup>76</sup>, cowplot<sup>77</sup>, scales<sup>78</sup>, viridis<sup>79</sup>, and RColorBrewer<sup>80,81</sup> for plotting; multidplyr<sup>82</sup>  
461 with parallel<sup>66</sup> and foreach<sup>83</sup> with iterators<sup>84</sup> and doMC<sup>85</sup>/doParallel<sup>86</sup> for parallel processing; and  
462 roxygen2<sup>87</sup> for code organization and documentation as well as other packages as referenced.

### 463 464 **1. Collection of data necessary for learning and evaluation**

465 ***E. coli* Sequence Data** – The nucleotide sequences from<sup>16</sup> were deduced by reconstructing forward and  
466 reverse primers (*i.e.* ~20 nucleotide stretches) from each gene in Colibri (based on EcoGene 11), the  
467 original source cited and later verified these primers against an archival spreadsheet provided directly by  
468 Daniel Daley (personal communication). To account for sequence and annotation corrections made to  
469 the genome after Daley, Rapp, *et al.*'s work, these primers were directly used to reconstruct the  
470 amplified product from the most recent release of the *E. coli* K-12 substr. MG1655 genome<sup>35</sup> (EcoGene  
471 3.0; U00096.3). Although Daniel Daley mentioned that raw reads from the Sanger sequencing runs may  
472 be available within his own archives, it was decided that the additional labor to retrieve this data and  
473 parse these reads would not significantly impact the model. The deduced nucleotide sequences were  
474 verified against the protein lengths given in Supplementary Table 1 from<sup>16</sup>. The plasmid library tested  
475 in<sup>26</sup> was provided by Daniel Daley, and those sequences are taken to be the same.

476  
477 ***E. coli* Training Data** – The preliminary results using the mean-normalized activities echoed the  
478 findings of<sup>16</sup> that these do not correlate with sequence features either in the univariate sense (many  
479 simple linear regressions, Supplementary Table 1<sup>16</sup>) or a multivariate sense (multiple linear regression,  
480 data not shown). This is presumably due to the loss of information regarding variability in expression  
481 level for given genes or due to the increase in variance of the normalized quantity (See Methods 4a) due  
482 to the normalization and averaging procedure. Daniel Daley and Mikaela Rapp provided spreadsheets of  
483 the outcomes from the 96-well plates used for their expression trials and sent scanned copies of the  
484 readouts from archival laboratory notebooks where the digital data was no longer accessible (personal  
485 communication). Those proteins without a reliable C-terminal localization (as given in the original  
486 work) or without raw expression outcomes were not included in further analyses.

487 Similarly, Nir Fluman also provided spreadsheets of the raw data from the set of three expression  
488 trials performed in<sup>26</sup>.

489  
490 **New York Consortium on Membrane Protein Structure (NYCOMPS) Data** – Brian Kloss, Marco  
491 Punta, and Edda Kloppman provided a dataset of actions performed by the NYCOMPS center including  
492 expression outcomes in various conditions<sup>2,3</sup>. The protein sequences were mapped to NCBI GenInfo  
493 Identifier (GI) numbers either via the Entrez system<sup>88</sup> or the Uniprot mapping service<sup>89</sup>. Each GI  
494 number was mapped to its nucleotide sequence via a combination of the NCBI Elink mapping service  
495 and the “coded\_by” or “locus” tags of Coding Sequence (CDS) features within GenBank entries.  
496 Though a custom script was created, a script from Peter Cock on the BioPython listserv to do the same  
497 task via a similar mapping mechanism was found<sup>90</sup>. To confirm all the sequences, the TargetTrack<sup>23</sup>  
498 XML file was parsed for the internal NYCOMPS identifiers and compared for sequence identity to those



499 that had been mapped using the custom script; 20 (less than 1%) of the sequences had minor  
500 inconsistencies and were manually replaced.

501

502 **Archaeal transporters Data** – The locus tags (“Gene Name” in Table 1) were mapped directly to the  
503 sequences and retrieved from NCBI <sup>44</sup>. Pikyee Ma and Margarida Archer clarified questions regarding  
504 their work to inform the analysis.

505

506 **GPCR Expression Data** – Nucleotide sequences were collected by mapping the protein identifiers  
507 given in Table 1 from <sup>47</sup> to protein GIs via the Uniprot mapping service <sup>89</sup> and subsequently to their  
508 nucleotide sequences via the custom mapping script described above (see NYCOMPS). The sequence  
509 length and pI were validated against those provided. Renaud Wagner assisted in providing the  
510 nucleotide sequences for genes whose listed identifiers were unable to be mapped and/or did not pass the  
511 validation criteria as the MeProtDB (the sponsor of the GPCR project) does not provide a public  
512 archive.

513

514 **Helicobacter pylori Data** – Nucleotide sequences were retrieved by mapping the locus tags given in  
515 Supplemental Table 1 from <sup>48</sup> to locus tags in the Jan 31, 2014 release of the *H. pylori* 26695 genome  
516 (AE000511.1). To verify sequence accuracy, sequences whose molecular weight matched that given by  
517 the authors were accepted. Those that did not match, in addition to the one locus tag that could not be  
518 mapped to the Jan 31, 2014 genome version, were retrieved from the Apr 9, 2015 release of the genome  
519 (NC\_000915.1). Both releases are derived from the original sequencing project <sup>91</sup>. After this curation, all  
520 mapped sequences matched the reported molecular weight.

521 In this data set, expression tests were performed in three expression vectors and scored as 1, 2, or  
522 3. Two vectors were scored via two methods. For these two vectors, the two scores were averaged to  
523 give a single number for the condition making them comparable to the third vector while yielding 2  
524 additional thresholds (1.5 and 2.5) result in the 5 total curves shown (Supplementary Fig. 2B).

525

526 **Mycobacterium tuberculosis Data** – The authors note using TubercuList through GenoList <sup>92</sup>, therefore,  
527 nucleotide sequences were retrieved from the archival website based on the original sequencing project  
528 <sup>93</sup>. The sequences corresponding to the identifiers and outcomes in Table 1 from <sup>46</sup> were validated  
529 against the provided molecular weight.

530

531 **Secondary Transporter Data** – GI Numbers given in Table 1 from <sup>50</sup> were matched to their CDS entries  
532 using the custom mapping script described above (see NYCOMPS). Only expression in *E. coli* with  
533 IPTG-inducible vectors was considered.

534

535 **Thermotoga maritima Data** – Gene names given in Table 1 <sup>94</sup> were matched to CDS entries in the Jan  
536 31, 2014 release of the *Thermotoga maritima* MSB8 genome (AE000512.1), a revised annotation of the  
537 original release <sup>95</sup>. The sequence length and molecular weight were validated against those provided.

538

539 **Pseudomonas aeruginosa Data** – Outcomes in Additional file 1 <sup>45</sup> were matched to coding sequences  
540 provided by Constance Jeffrey.

541

542 **Shine-Dalgarno-like mutagenesis Data** – Folded protein is quantified by densitometry measurement  
543 <sup>96,97</sup> of the relevant band in Figure 6 of <sup>26</sup>. Relative difference is calculated as is standard:

544

$$\frac{\text{metric}_{\text{mutant}} - \text{metric}_{\text{wildtype}}}{\frac{1}{2} |\text{metric}_{\text{mutant}} - \text{metric}_{\text{wildtype}}|}$$

545

546

547

548

## 2. Details related to the calculation of sequence features

549

550

551

552

553

554

555

556

557

558

## 3. Preparation for model learning

559

560

561

562

563

564

565

566

567

568

569

Calculated sequence features for the IMPs in the *E. coli* dataset as well as raw activity measurements, *i.e.* each 96-well plate, were loaded into R. As is best practice in using Support Vector Machines, each feature was “centered” and “scaled” where the mean value of a given feature was subtracted from each data point and then divided by the standard deviation of that feature using `preprocess`<sup>98</sup>. As is standard practice, the resulting set was then culled for those features of near zero-variance, over 95% correlation (Pearson’s  $r$ ), and linear dependence (`nearZeroVar`, `findCorrelation`, `findLinearCombos`)<sup>98</sup>. In particular this procedure removed extraneous degrees of freedom during the training process which carry little to no additional information with respect to the feature space and which may over represent certain redundant features. Features and outcomes for each list (“query”) were written into the SVM<sup>light</sup> format using a modified `svmlight.write`<sup>99</sup>.

570

571

572

573

The final features were calculated for each sequence in the test datasets, prepared for scoring by “centering” and “scaling” by the training set parameters via `preprocess`<sup>98</sup>, and then written into SVM<sup>light</sup> format again using a modified `svmlight.write`.

574

575

576

577

578

579

580

581

582

583

584

585

586

587

588

## 4. Model selection, training, and evaluation using SVM<sup>rank</sup>

**a.** At the most basic level, our predictive model is a learned function that maps the parameter space (consisting of nucleotide and protein sequence features) to a response variable (expression level) through a set of governing weights ( $w_1, w_2, \dots, w_N$ ). Depending on how the response variable is defined, these weights can be approximated using several different methods. As such, defining a response variable that is reflective of the available training data is key to selecting an appropriate learning algorithm.

The quantitative 96-well plate results<sup>16</sup> that comprise our training data do not offer an absolute expression metric valid over all plates—the top expressing proteins in one plate would not necessarily be the best expressing within another. As such, this problem is suited for preference-ranking methods. As a ranking problem, the response variable is the ordinal rank for each protein derived from its overexpression relative to the other members of the same plate of expression trials. In other words, the aim is to rank highly expressed proteins (based on numerous trials) at higher scores than lower expressed proteins by fitting against the order of expression outcomes from each constituent 96-well plate.

589 **b.** As the first work of this kind, the aim was to employ the simplest framework necessary taking in  
590 account the considerations above. The method chosen computes all valid pairwise classifications (*i.e.*  
591 within a single plate) transforming the original ranking problem into a binary classification problem.  
592 The algorithm outputs a score for each input by minimizing the number of swapped pairs thereby  
593 maximizing Kendall's  $\tau$ <sup>100</sup>. For example, consider the following data generated via context A  
594  $(X_{A,1}, Y_{A,1}), (X_{A,2}, Y_{A,2})$  and B  $(X_{B,1}, Y_{B,1}), (X_{B,2}, Y_{B,2})$  where observed response follows as index  $i$ , *i.e.*  
595  $Y_n < Y_{n+1}$ . Binary classifier  $f(X_i, X_j)$  gives a score of 1 if an input pair matches its ordering criteria and  
596  $-1$  if not, *i.e.*  $Y_i < Y_j$ :

$$\begin{aligned} 597 \quad & f(X_{A,1}, X_{A,2}) = 1; f(X_{A,2}, X_{A,1}) = -1 \\ 598 \quad & f(X_{B,1}, X_{B,2}) = 1; f(X_{B,2}, X_{B,1}) = -1 \\ 599 \quad & f(X_{A,1}, X_{B,2}), f(X_{A,2}, X_{B,1}) \text{ are invalid} \end{aligned}$$

600  
601 Free parameters describing  $f$  are calculated such that those calculated orderings  
602  $f(X_{A,1}), f(X_{A,2}) \dots; f(X_{B,1}), f(X_{B,2}) \dots$  most closely agree (overall Kendall's  $\tau$ ) with the observed  
603 ordering  $Y_n, Y_{n+1}, \dots$ . In this sense,  $f$  is a pairwise Learning to Rank method.

604 Within this class of models, a linear preference-ranking Support Vector Machine was employed  
605 <sup>101</sup>. To be clear, as an algorithm a preference-ranking SVM operates similarly to the canonical SVM  
606 binary classifier. In the traditional binary classification problem, a linear SVM seeks the maximally  
607 separating hyper-plane in the feature space between two classes, where class membership is determined  
608 by which side of the hyper-plane points reside. For some  $n$  linear separable training examples  $D =$   
609  $\{(x_i) | x_i \in \mathbb{R}^d\}^n$  and two classes  $y_i \in \{-1, 1\}$ , a linear SVM seeks a mapping from the  $d$ -dimensional  
610 feature space  $\mathbb{R}^d \rightarrow \{-1, 1\}$  by finding two maximally separated hyperplanes  $w \cdot x - b = 1$  and  $w \cdot$   
611  $x - b = -1$  with constraints that  $w \cdot x_i - b \geq 1$  for all  $x_i$  with  $y_i \in \{1\}$  and  $w \cdot x_i - b \leq -1$  for all  
612  $x_i$  with  $y_i \in \{-1\}$ . The feature weights correspond to the vector  $w$ , which is the vector perpendicular to  
613 the separating hyperplanes, and are computable in  $O(n \log n)$  implemented as part of the SVM<sup>rank</sup>  
614 software package, though in  $O(n^2)$ <sup>41</sup>. See<sup>101</sup> for an in-depth, technical discussion.

615 **c.** In a soft-margin SVM where training data is not linearly separable, a tradeoff between misclassified  
616 inputs and separation from the hyperplane must be specified. This parameter  $C$  was found by training  
617 models against raw data from Daley, Rapp, *et al.* with a grid of candidate  $C$  values ( $2^n \forall n \in [-5, 5]$ )  
618 and then evaluated against the raw "folded protein" measurements from Fluman, *et al.* The final model  
619 was chosen by selecting that with the lowest error from the process above ( $C = 2^5$ ). To be clear, the final  
620 model is composed solely of a single weight for each feature; the tradeoff parameter  $C$  is only part of the  
621 training process.

622 Qualitatively, such a preference-ranking method constructs a model that ranks groups of proteins  
623 with higher expression level higher than other groups with lower expression value. In comparison to  
624 methods such as linear regression and binary classification, this approach is more robust and less  
625 affected by the inherent stochasticity of the training data.

## 627 **5. Quantitative Assessment of Predictive Performance**

628 In generating a predictive model, one aims to enrich for positive outcomes while ensuring they  
629 do not come at the cost of increased false positive diagnoses. This is formalized in Receiver Operating  
630 Characteristic (ROC) theory (for a primer see<sup>42</sup>), where the true positive rate is plotted against the false  
631 positive rate for all classification thresholds (score cutoffs in the ranked list). In this framework, the  
632 overall ability of the model to resolve positive from negative outcomes is evaluated by analyzing the  
633 Area Under a ROC curve (AUC) where  $AUC_{\text{perfect}}=100\%$  and  $AUC_{\text{random}}=50\%$  (percentage signs are

634 omitted throughout the text and figures). All ROCs are calculated through pROC<sup>102</sup> using the analytic  
635 Delong method for AUC confidence intervals<sup>103</sup>. Bootstrapped AUC CIs (N = 10<sup>6</sup>) were precise to 4  
636 decimal places suggesting that analytic CIs are valid for the NYCOMPS dataset.

637 With several of our datasets, no definitive standard or clear-cut classification for positive  
638 expression exists. However, the aim is to show and test all reasonable classification thresholds of  
639 positive expression for each dataset in order to evaluate predictive performance as follows:

640 **Training data** – The outcomes are quantitative (activity level), so each ROC is calculated by  
641 normalizing within each dataset to the standard well subject to the discussion in 4a above (LepB for  
642 PhoA, and InvLepB for GFP) (examples in Fig. 1D) for each possible threshold, *i.e.* each normalized  
643 expression value with each AUC plotted in Fig. 1E. 95% confidence intervals of Spearman's  $\rho$  are given  
644 by 10<sup>6</sup> iterations of a bias-corrected and accelerated (BCa) bootstrap of the data (Fig. 1A,C)<sup>104</sup>.

645 **Large-scale** – ROCs were calculated for each of the expression classes (Fig. 2E). Regardless of the  
646 split, predictive performance is noted. The binwidth for the histogram was determined using the  
647 Freedman-Diaconis rule<sup>105</sup>, and scores outside the plotted range comprising <0.6% of the density were  
648 implicitly hidden.

649 **Small-scale** – Classes can be defined in many different ways. To be principled about the matter, ROCs  
650 for each possible cutoff are presented based on definitions from each publication (Fig. 3C,E,G,  
651 Supplementary Fig. 2B,D,F). See Methods 1 for any necessary details about outcome classifications for  
652 each dataset.

653

## 654 **6. Feature Weights**

655 Weights for the learned SVM are pulled directly from the model file produced by SVM<sup>light</sup> and are given  
656 in Supplementary Table 1.

657

## 658 **8. Availability**

659 All analysis is documented in a series of R notebooks<sup>106</sup> available openly at  
660 [github.com/clemlab/IMProve](https://github.com/clemlab/IMProve). These notebooks provide fully executable instructions for the  
661 reproduction of the analyses and the generation of figures and statistics in this study. The IMProve  
662 model is available as a web service at [clemonslab.caltech.edu](http://clemonslab.caltech.edu). Additional code is available upon request.

## 663 References

- 664 1. Hendrickson, W. A. Atomic-level analysis of membrane-protein structure. *Nat. Struct. Mol. Biol.* **23**,  
665 464–467 (2016).
- 666 2. Punta, M. *et al.* Structural genomics target selection for the New York consortium on membrane  
667 protein structure. *J. Struct. Funct. Genomics* **10**, 255–268 (2009).
- 668 3. Love, J. *et al.* The New York Consortium on Membrane Protein Structure (NYCOMPS): a high-  
669 throughput platform for structural genomics of integral membrane proteins. *J. Struct. Funct. Genomics*  
670 **11**, 191–199 (2010).
- 671 4. Berman, H. M. *et al.* The Protein Data Bank. *Nucleic Acids Res.* **28**, 235–242 (2000).
- 672 5. Lewinson, O., Lee, A. T. & Rees, D. C. The funnel approach to the precrystallization production of  
673 membrane proteins. *J. Mol. Biol.* **377**, 62–73 (2008).
- 674 6. Johansson, L. C., Stauch, B., Ishchenko, A. & Cherezov, V. A Bright Future for Serial Femtosecond  
675 Crystallography with XFELs. *Trends Biochem. Sci.* **42**, 749–762 (2017).
- 676 7. Merk, A. *et al.* Breaking Cryo-EM Resolution Barriers to Facilitate Drug Discovery. *Cell* **165**,  
677 1698–1707 (2016).
- 678 8. Nannenga, B. L. & Gonen, T. MicroED opens a new era for biological structure determination.  
679 *Curr. Opin. Struct. Biol.* **40**, 128–135 (2016).
- 680 9. Bill, R. M. *et al.* Overcoming barriers to membrane protein structure determination. *Nat. Biotechnol.*  
681 **29**, 335–340 (2011).
- 682 10. Nørholm, M. H. H. *et al.* Manipulating the genetic code for membrane protein production: what  
683 have we learnt so far? *Biochim. Biophys. Acta* **1818**, 1091–1096 (2012).
- 684 11. Wagner, S. *et al.* Tuning *Escherichia coli* for membrane protein overexpression. *Proc. Natl. Acad.*  
685 *Sci. U. S. A.* **105**, 14371–14376 (2008).
- 686 12. Marshall, S. S. *et al.* A Link between Integral Membrane Protein Expression and Simulated  
687 Integration Efficiency. *Cell Rep.* **16**, 2169–2177 (2016).
- 688 13. Sarkar, C. A. *et al.* Directed evolution of a G protein-coupled receptor for expression, stability, and  
689 binding selectivity. *Proc. Natl. Acad. Sci. U. S. A.* **105**, 14808–14813 (2008).
- 690 14. Schlinkmann, K. M. *et al.* Critical features for biosynthesis, stability, and functionality of a G  
691 protein-coupled receptor uncovered by all-versus-all mutations. *Proc. Natl. Acad. Sci. U. S. A.* **109**,  
692 9810–9815 (2012).
- 693 15. Niesen, M. J. M., Marshall, S. S., Miller, T. F. & Clemons, W. M. Improving membrane protein  
694 expression by optimizing integration efficiency. *J. Biol. Chem.* (2017). doi:10.1074/jbc.M117.813469
- 695 16. Daley, D. O. *et al.* Global topology analysis of the *Escherichia coli* inner membrane proteome.  
696 *Science* **308**, 1321–1323 (2005).
- 697 17. Nørholm, M. H. H. *et al.* Improved production of membrane proteins in *Escherichia coli* by selective  
698 codon substitutions. *FEBS Lett.* **587**, 2352–2358 (2013).
- 699 18. Seppälä, S., Slusky, J. S., Lloris-Garcera, P., Rapp, M. & von Heijne, G. Control of membrane  
700 protein topology by a single C-terminal residue. *Science* **328**, 1698–1700 (2010).
- 701 19. Van Lehn, R. C., Zhang, B. & Miller, T. F. Regulation of multispanning membrane protein topology  
702 via post-translational annealing. *eLife* **4**, (2015).
- 703 20. Bertone, P. *et al.* SPINE: an integrated tracking database and data mining approach for identifying  
704 feasible targets in high-throughput structural proteomics. *Nucleic Acids Res.* **29**, 2884–2898 (2001).
- 705 21. Jahandideh, S., Jaroszewski, L. & Godzik, A. Improving the chances of successful protein structure  
706 determination with a random forest classifier. *Acta Crystallogr. D Biol. Crystallogr.* **70**, 627–635  
707 (2014).



- 708 22. Price, W. N. *et al.* Understanding the physical properties that control protein crystallization by  
709 analysis of large-scale experimental data. *Nat. Biotechnol.* **27**, 51–57 (2009).
- 710 23. Chen, L., Oughtred, R., Berman, H. M. & Westbrook, J. TargetDB: a target registration database for  
711 structural genomics projects. *Bioinformatics* **20**, 2860–2862 (2004).
- 712 24. Gabanyi, M. J. *et al.* The Structural Biology Knowledgebase: a portal to protein structures,  
713 sequences, functions, and methods. *J. Struct. Funct. Genomics* **12**, 45–54 (2011).
- 714 25. Slabinski, L. *et al.* The challenge of protein structure determination--lessons from structural  
715 genomics. *Protein Sci. Publ. Protein Soc.* **16**, 2472–2482 (2007).
- 716 26. Fluman, N., Navon, S., Bibi, E. & Pilpel, Y. mRNA-programmed translation pauses in the targeting  
717 of E. coli membrane proteins. *eLife* **3**, (2014).
- 718 27. Geertsma, E. R., Groeneveld, M., Slotboom, D.-J. & Poolman, B. Quality control of overexpressed  
719 membrane proteins. *Proc. Natl. Acad. Sci. U. S. A.* **105**, 5722–5727 (2008).
- 720 28. Peden, J. F. Analysis of codon usage. (University of Nottingham, 2000).
- 721 29. dos Reis, M., Wernisch, L. & Savva, R. Unexpected correlations between gene expression and  
722 codon usage bias from microarray data for the whole Escherichia coli K-12 genome. *Nucleic Acids Res.*  
723 **31**, 6976–6985 (2003).
- 724 30. Zadeh, J. N. *et al.* NUPACK: Analysis and design of nucleic acid systems. *J. Comput. Chem.* **32**,  
725 170–173 (2011).
- 726 31. Lorenz, R. *et al.* ViennaRNA Package 2.0. *Algorithms Mol. Biol. AMB* **6**, 26 (2011).
- 727 32. Coleman, J. R. *et al.* Virus attenuation by genome-scale changes in codon pair bias. *Science* **320**,  
728 1784–1787 (2008).
- 729 33. Linding, R. *et al.* Protein disorder prediction: implications for structural proteomics. *Structure* **11**,  
730 1453–1459 (2003).
- 731 34. Yang, Z. R., Thomson, R., McNeil, P. & Esnouf, R. M. RONN: the bio-basis function neural  
732 network technique applied to the detection of natively disordered regions in proteins. *Bioinformatics* **21**,  
733 3369–3376 (2005).
- 734 35. Zhou, J. & Rudd, K. E. EcoGene 3.0. *Nucleic Acids Res.* **41**, D613–624 (2013).
- 735 36. Wimley, W. C., Creamer, T. P. & White, S. H. Solvation energies of amino acid side chains and  
736 backbone in a family of host-guest pentapeptides. *Biochemistry (Mosc.)* **35**, 5109–5124 (1996).
- 737 37. Engelman, D. M., Steitz, T. A. & Goldman, A. Identifying nonpolar transbilayer helices in amino  
738 acid sequences of membrane proteins. *Annu. Rev. Biophys. Biophys. Chem.* **15**, 321–353 (1986).
- 739 38. Hessa, T. *et al.* Molecular code for transmembrane-helix recognition by the Sec61 translocon.  
740 *Nature* **450**, 1026–1030 (2007).
- 741 39. Käll, L., Krogh, A. & Sonnhammer, E. L. L. A combined transmembrane topology and signal  
742 peptide prediction method. *J. Mol. Biol.* **338**, 1027–1036 (2004).
- 743 40. Goodman, D. B., Church, G. M. & Kosuri, S. Causes and effects of N-terminal codon bias in  
744 bacterial genes. *Science* **342**, 475–479 (2013).
- 745 41. Tsochantaridis, I., Joachims, T., Hofmann, T. & Altun, Y. Large Margin Methods for Structured and  
746 Interdependent Output Variables. *J. Mach. Learn. Res.* **6**, 1453–1484 (2005).
- 747 42. Swets, J. A., Dawes, R. M. & Monahan, J. Better decisions through science. *Sci. Am.* **283**, 82–87  
748 (2000).
- 749 43. Finn, R. D. *et al.* Pfam: the protein families database. *Nucleic Acids Res.* **42**, D222–230 (2014).
- 750 44. Ma, P. *et al.* An efficient strategy for small-scale screening and production of archaeal membrane  
751 transport proteins in Escherichia coli. *PloS One* **8**, e76913 (2013).
- 752 45. Madhavan, V., Bhatt, F. & Jeffery, C. J. Recombinant expression screening of P. aeruginosa  
753 bacterial inner membrane proteins. *BMC Biotechnol.* **10**, 83 (2010).

- 754 46. Korepanova, A. *et al.* Cloning and expression of multiple integral membrane proteins from  
755 Mycobacterium tuberculosis in Escherichia coli. *Protein Sci.* **14**, 148–158 (2005).
- 756 47. Lundstrom, K. *et al.* Structural genomics on membrane proteins: comparison of more than 100  
757 GPCRs in 3 expression systems. *J. Struct. Funct. Genomics* **7**, 77–91 (2006).
- 758 48. Psakis, G. *et al.* Expression screening of integral membrane proteins from Helicobacter pylori  
759 26695. *Protein Sci.* **16**, 2667–2676 (2007).
- 760 49. Dobrovetsky, E. *et al.* High-throughput production of prokaryotic membrane proteins. *J. Struct.*  
761 *Funct. Genomics* **6**, 33–50 (2005).
- 762 50. Surade, S. *et al.* Comparative analysis and ‘expression space’ coverage of the production of  
763 prokaryotic membrane proteins for structural genomics. *Protein Sci.* **15**, 2178–2189 (2006).
- 764 51. Bernaudat, F. *et al.* Heterologous expression of membrane proteins: choosing the appropriate host.  
765 *PloS One* **6**, e29191 (2011).
- 766 52. Eshaghi, S. *et al.* An efficient strategy for high-throughput expression screening of recombinant  
767 integral membrane proteins. *Protein Sci.* **14**, 676–683 (2005).
- 768 53. Gordon, E. *et al.* Effective high-throughput overproduction of membrane proteins in Escherichia  
769 coli. *Protein Expr. Purif.* **62**, 1–8 (2008).
- 770 54. Petrovskaya, L. E. *et al.* Expression of G-protein coupled receptors in Escherichia coli for structural  
771 studies. *Biochem. Mosc.* **75**, 881–891 (2010).
- 772 55. Szakonyi, G. *et al.* A genomic strategy for cloning, expressing and purifying efflux proteins of the  
773 major facilitator superfamily. *J. Antimicrob. Chemother.* **59**, 1265–1270 (2007).
- 774 56. Li, G.-W., Oh, E. & Weissman, J. S. The anti-Shine-Dalgarno sequence drives translational pausing  
775 and codon choice in bacteria. *Nature* **484**, 538–541 (2012).
- 776 57. Gamble, C. E., Brule, C. E., Dean, K. M., Fields, S. & Grayhack, E. J. Adjacent Codons Act in  
777 Concert to Modulate Translation Efficiency in Yeast. *Cell* **166**, 679–690 (2016).
- 778 58. Chartron, J. W., Hunt, K. C. L. & Frydman, J. Cotranslational signal-independent SRP preloading  
779 during membrane targeting. *Nature* **536**, 224–228 (2016).
- 780 59. Slabinski, L. *et al.* XtalPred: a web server for prediction of protein crystallizability. *Bioinforma. Oxf.*  
781 *Engl.* **23**, 3403–3405 (2007).
- 782 60. Wang, H. *et al.* CrysAlis: an integrated server for computational analysis and design of protein  
783 crystallization. *Sci. Rep.* **6**, 21383 (2016).
- 784 61. Towns, J. *et al.* XSEDE: Accelerating Scientific Discovery. *Comput. Sci. Eng.* **16**, 62–74 (2014).
- 785 62. Van Rossum, G. & Drake Jr, F. L. *Python reference manual*. (Centrum voor Wiskunde en  
786 Informatica Amsterdam, 1995).
- 787 63. Cock, P. J. A. *et al.* Biopython: freely available Python tools for computational molecular biology  
788 and bioinformatics. *Bioinformatics* **25**, 1422–1423 (2009).
- 789 64. van der Walt, S., Colbert, S. C. & Varoquaux, G. The NumPy Array: A Structure for Efficient  
790 Numerical Computation. *Comput. Sci. Eng.* **13**, 22–30 (2011).
- 791 65. Tange, O. GNU Parallel - The Command-Line Power Tool. *Logim USENIX Mag.* **36**, 42–47 (2011).
- 792 66. R Core Team. *R: A Language and Environment for Statistical Computing*. (R Foundation for  
793 Statistical Computing, 2015).
- 794 67. RStudio Team. *RStudio: Integrated Development Environment for R*. (RStudio, Inc., 2015).
- 795 68. Bache, S. M. & Wickham, H. *magrittr: A Forward-Pipe Operator for R*. (2014).
- 796 69. Wickham, H. The Split-Apply-Combine Strategy for Data Analysis. *J. Stat. Softw.* **40**, 1–29 (2011).
- 797 70. Wickham, H. & Francois, R. *dplyr: A Grammar of Data Manipulation*. (2015).
- 798 71. Aho, K. *asbio: A Collection of Statistical Tools for Biologists*. (2015).
- 799 72. Weinert, K. *datamart: Unified access to your data sources*. (2014).

- 800 73. Wickham, H. *ggplot2: elegant graphics for data analysis*. (Springer New York, 2009).
- 801 74. Clarke, E. & Sherrill-Mix, S. *ggbeeswarm: Categorical Scatter (Violin Point) Plots*. (2015).
- 802 75. Schloerke, B. *et al. GGally: Extension to 'ggplot2'*. (2016).
- 803 76. Auguie, B. *gridExtra: Miscellaneous Functions for 'Grid' Graphics*. (2015).
- 804 77. Wilke, C. O. *cowplot: Streamlined Plot Theme and Plot Annotations for 'ggplot2'*. (2015).
- 805 78. Wickham, H. *scales: Scale Functions for Visualization*. (2015).
- 806 79. Garnier, S. *viridis: Default Color Maps from 'matplotlib'*. (2016).
- 807 80. Neuwirth, E. *RColorBrewer: ColorBrewer Palettes*. (2014).
- 808 81. Harrower, M. & Brewer, C. A. ColorBrewer.org: an online tool for selecting colour schemes for  
809 maps. *Cartogr. J.* **40**, 27–37 (2003).
- 810 82. Wickham, H. *multidplyr: Partitioned data frames for 'dplyr'*.
- 811 83. Revolution Analytics & Weston, S. *foreach: Provides Foreach Looping Construct for R*. (2015).
- 812 84. Revolution Analytics & Weston, S. *iterators: Provides Iterator Construct for R*. (2015).
- 813 85. Revolution Analytics & Weston, S. *doMC: Foreach Parallel Adaptor for 'parallel'*. (2015).
- 814 86. Revolution Analytics & Weston, S. *doParallel: Foreach Parallel Adaptor for the 'parallel'*  
815 *Package*. (2015).
- 816 87. Wickham, H., Danenberg, P. & Eugster, M. *roxygen2: In-Source Documentation for R*. (2015).
- 817 88. Schuler, G. D., Epstein, J. A., Ohkawa, H. & Kans, J. A. Entrez: molecular biology database and  
818 retrieval system. *Methods Enzymol.* **266**, 141–162 (1996).
- 819 89. UniProt Consortium. Reorganizing the protein space at the Universal Protein Resource (UniProt).  
820 *Nucleic Acids Res.* **40**, D71–75 (2012).
- 821 90. Cock, P. [BioPython] Downloading CDS sequences. (2009).
- 822 91. Tomb, J. F. *et al.* The complete genome sequence of the gastric pathogen *Helicobacter pylori*.  
823 *Nature* **388**, 539–547 (1997).
- 824 92. Lechat, P., Hummel, L., Rousseau, S. & Moszer, I. GenoList: an integrated environment for  
825 comparative analysis of microbial genomes. *Nucleic Acids Res.* **36**, D469–474 (2008).
- 826 93. Cole, S. T. *et al.* Deciphering the biology of *Mycobacterium tuberculosis* from the complete genome  
827 sequence. *Nature* **393**, 537–544 (1998).
- 828 94. Dobrovetsky, E. *et al.* High-throughput production of prokaryotic membrane proteins. *J. Struct.*  
829 *Funct. Genomics* **6**, 33–50 (2005).
- 830 95. Nelson, K. E. *et al.* Evidence for lateral gene transfer between Archaea and bacteria from genome  
831 sequence of *Thermotoga maritima*. *Nature* **399**, 323–329 (1999).
- 832 96. Schindelin, J. *et al.* Fiji: an open-source platform for biological-image analysis. *Nat. Methods* **9**,  
833 676–682 (2012).
- 834 97. Schneider, C. A., Rasband, W. S. & Eliceiri, K. W. NIH Image to ImageJ: 25 years of image  
835 analysis. *Nat. Methods* **9**, 671–675 (2012).
- 836 98. Kuhn, M. Building predictive models in R using the caret package. *J Stat Soft* (2008).
- 837 99. Weihs, C., Ligges, U., Luebke, K. & Raabe, N. klaR Analyzing German Business Cycles. in *Data*  
838 *Analysis and Decision Support* (eds. Baier, D., Decker, R. & Schmidt-Thieme, L.) 335–343 (Springer-  
839 Verlag, 2005).
- 840 100. Kendall, M. G. A New Measure of Rank Correlation. *Biometrika* **30**, 81 (1938).
- 841 101. Joachims, T. Optimizing search engines using clickthrough data. in 133 (ACM Press, 2002).  
842 doi:10.1145/775047.775067
- 843 102. Robin, X. *et al.* pROC: an open-source package for R and S+ to analyze and compare ROC curves.  
844 *BMC Bioinformatics* **12**, 77 (2011).

- 845 103. DeLong, E. R., DeLong, D. M. & Clarke-Pearson, D. L. Comparing the areas under two or more  
846 correlated receiver operating characteristic curves: a nonparametric approach. *Biometrics* **44**, 837–845  
847 (1988).
- 848 104. Canty, A. & Ripley, B. D. *boot: Bootstrap R (S-Plus) Functions*. (2015).
- 849 105. Freedman, D. & Diaconis, P. On the histogram as a density estimator:L 2 theory. *Z. F*   
850 *Wahrscheinlichkeitstheorie Verwandte Geb.* **57**, 453–476 (1981).
- 851 106. Xie, Y. knitr: A Comprehensive Tool for Reproducible Research in R. in *Implementing*  
852 *Reproducible Computational Research* (eds. Stodden, V., Leisch, F. & Peng, R. D.) (Chapman and  
853 Hall/CRC, 2014).
- 854 107. Saier, M. H. *et al.* The Transporter Classification Database (TCDB): recent advances. *Nucleic*  
855 *Acids Res.* **44**, D372-379 (2016).
- 856

857 **Figures and Tables**



Fig. 1

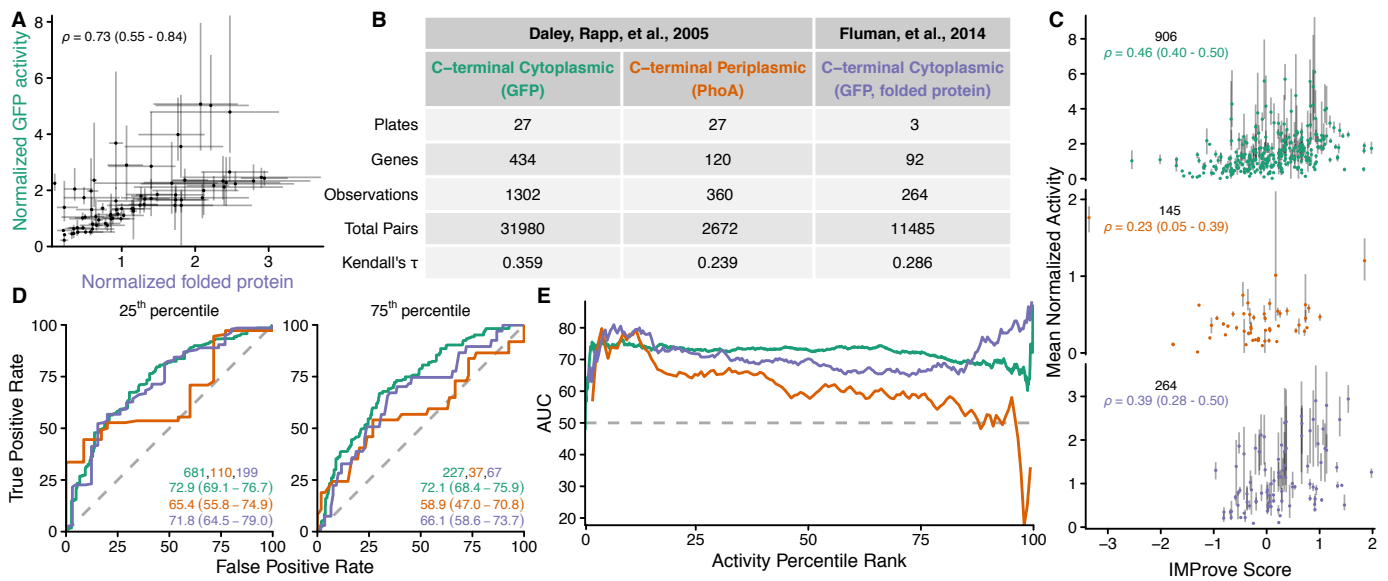

859 **Fig. 1. Training performance.** (A) A comparison of GFP activity<sup>16</sup> with measured folded protein<sup>26</sup>  
860 where each point represents the mean for a given gene tested in both works, and error bars plot the  
861 extrema. Spearman's rank correlation coefficient and 95% confidence interval (CI)<sup>104</sup> are shown. (B)  
862 Plates are the number of independent sets of measurements within which expression levels can be  
863 reliably compared. Genes are the number of proteins for which the C-terminus was reliably ascertained  
864<sup>16</sup>. Observations are the total number of expression data points accessible. Total pairs are the number of  
865 comparable expression measurements (*i.e.* those within a single plate). Kendall's  $\tau$  is the metric  
866 maximized by the training process (See Methods 4b). The color of the column heading identifying each  
867 experimental set is retained throughout the figure. (C) Agreement against the normalized outcomes  
868 plotted as the mean activity (see Methods 5 for definition) versus the score with error bars providing the  
869 extent of observed activities (Spearman's  $\rho$  and 95% CI noted). (D) Illustrative Receiver Operating  
870 Characteristics (ROC) for thresholds at 25<sup>th</sup> and 75<sup>th</sup> percentile in activity with the number of positive  
871 outcomes at that threshold, the Area Under the Curve (AUC), and 95% CI indicated. (E) The AUC of  
872 the ROC at every possible activity threshold.

Fig. 2

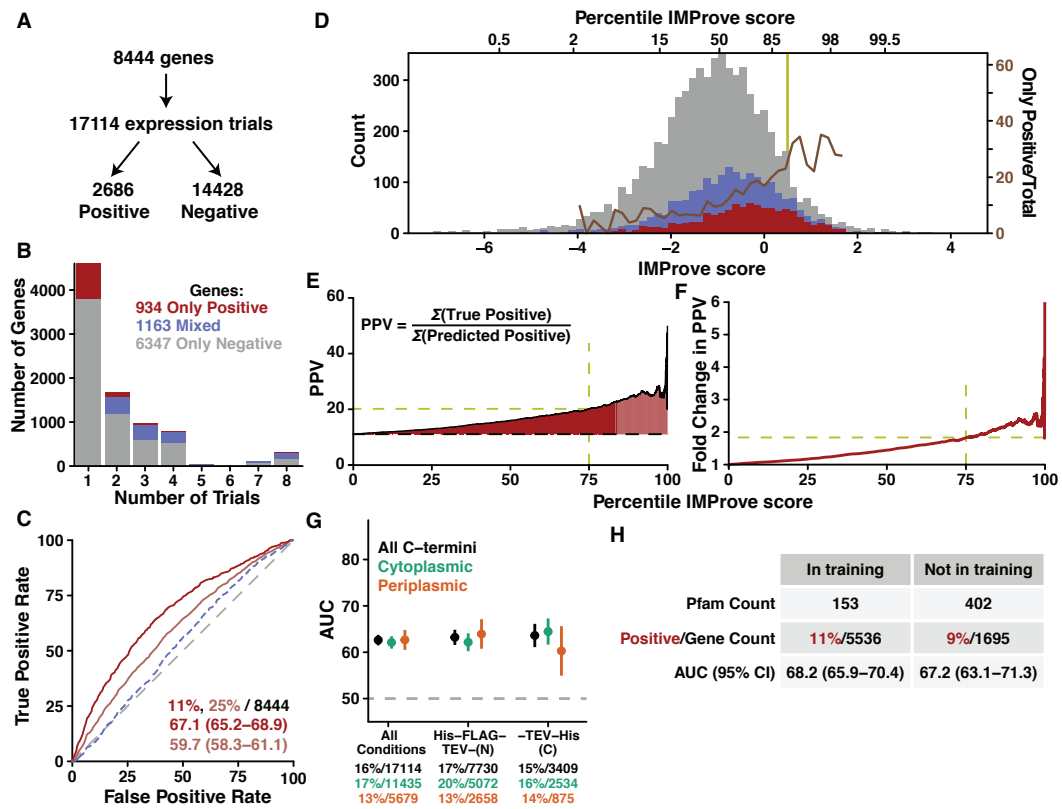

874 **Fig. 2. Success of the model against outcomes from NYCOMPS. (A)** An overview of the NYCOMPS  
875 outcomes and **(B)** a histogram of the number of conditions tested per gene colored based on outcome.  
876 **(C)** Receiver Operating Characteristics for positive groupings given by Only Positive outcomes genes  
877 (red) and genes with at least one positive outcome (pink). The percent positive for each group  
878 (corresponding color), total counts (black), and Area Under the Curve (AUC) values with 95%  
879 Confidence Interval (CI) are shown. The ROC considering genes with Mixed outcomes only as positive  
880 is shown as a blue dashed line with an AUC of 53.5 (51.8-55.2). The grey dashed line shows the  
881 performance of a completely random predictor (AUC = 50). **(D)** Histograms of genes with Only Positive  
882 (red) and Only Negative outcomes (grey) across IMProve scores (binned as described in Methods 5).  
883 The percentage of Only Positive outcomes in each bin is overlaid as a brown line (right axis). **(E)** The  
884 Positive Predictive Value (PPV) plotted for each percentile IMProve score, *e.g.* 75 on the x-axis  
885 indicates the PPV for the top 25% of genes based on score for genes, where positive indicates genes  
886 with Only Positive outcomes. The dashed line shows the overall success rate of the NYCOMPS  
887 experimental outcomes (~11% Only Positive). **(F)** The fold change in the PPV as a function of IMProve  
888 score relative to the success rate of NYCOMPS. **(G)** The AUCs for outcomes across all trials and within  
889 the most-tested plasmids along with 95% CI. Performances are also split by predicted C-terminal  
890 localization<sup>39</sup>. The numbers below indicate the total number of trials for each group and the percent  
891 within that group that were positive. **(H)** The NYCOMPS dataset split by the presence or absence of a  
892 Pfam family in the training set with AUCs calculated by considering Only Positive genes as positive  
893 outcomes.

Fig. 3

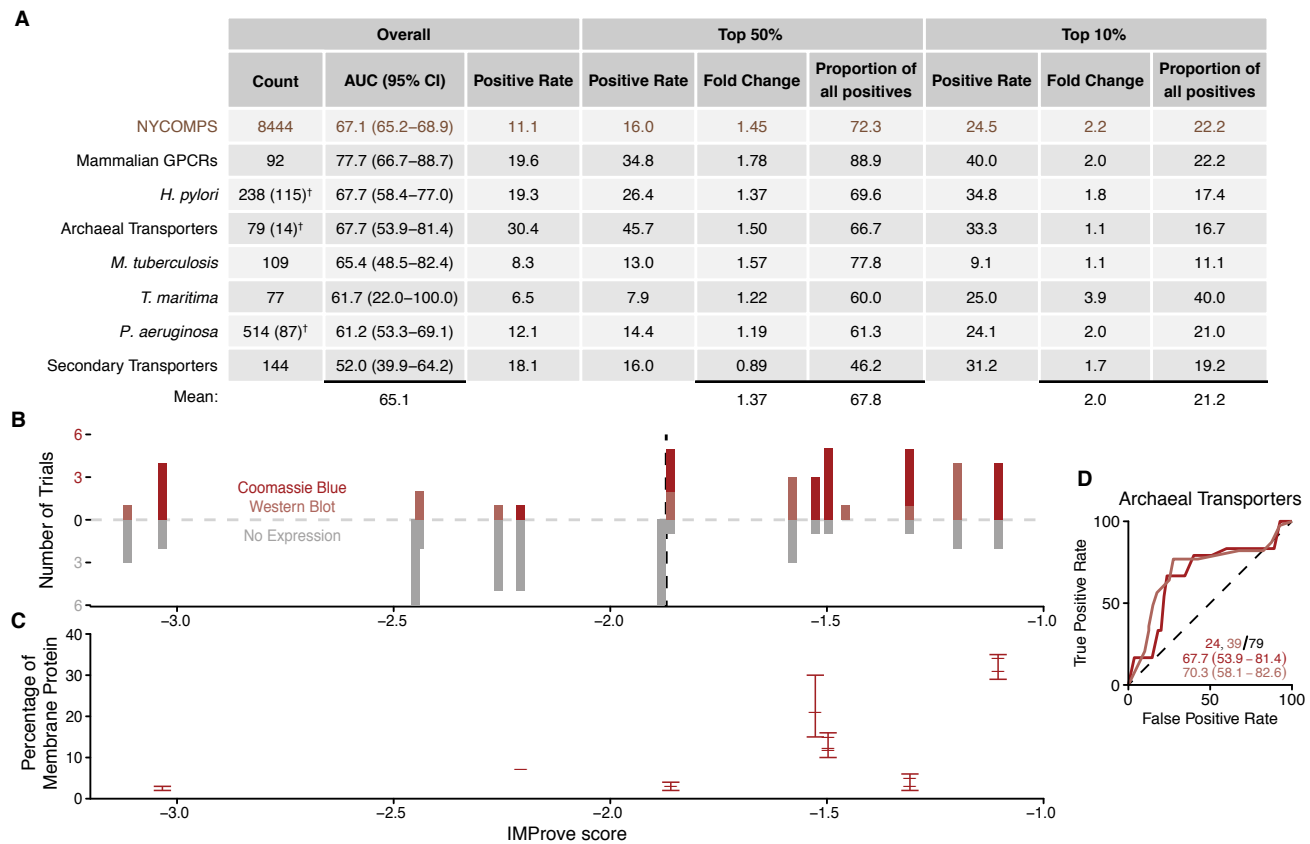



895 **Fig. 3. Success of the model against small scale outcomes. (A)** Summary of the model's performance  
896 against NYCOMPS and a variety of small scale expression experiments. Positive outcomes refer to  
897 those in the highest group as assigned by the authors of the respective studies. Where targets were tested  
898 in more than one condition (e.g. different plasmids or strains), the number of distinct proteins are  
899 indicated in parenthesis with a dagger. **(B)** The expression of archaeal transporters in up to 6 trials <sup>44</sup>.  
900 Positive expression count is plotted above the dashed line and negative outcomes below the line. **(C)**  
901 Quantitative expression outcomes of those transporters as detected by Coomassie Blue. **(D)** Receiver  
902 Operating Characteristics (ROC) along with Areas Under the Curves (AUC) and 95% confidence  
903 interval as well as the total number of positives for the given threshold (red hues) along with the total  
904 outcomes (black) are presented. In each curve, increasing expression thresholds are displayed as deeper  
905 red.

Fig. 4

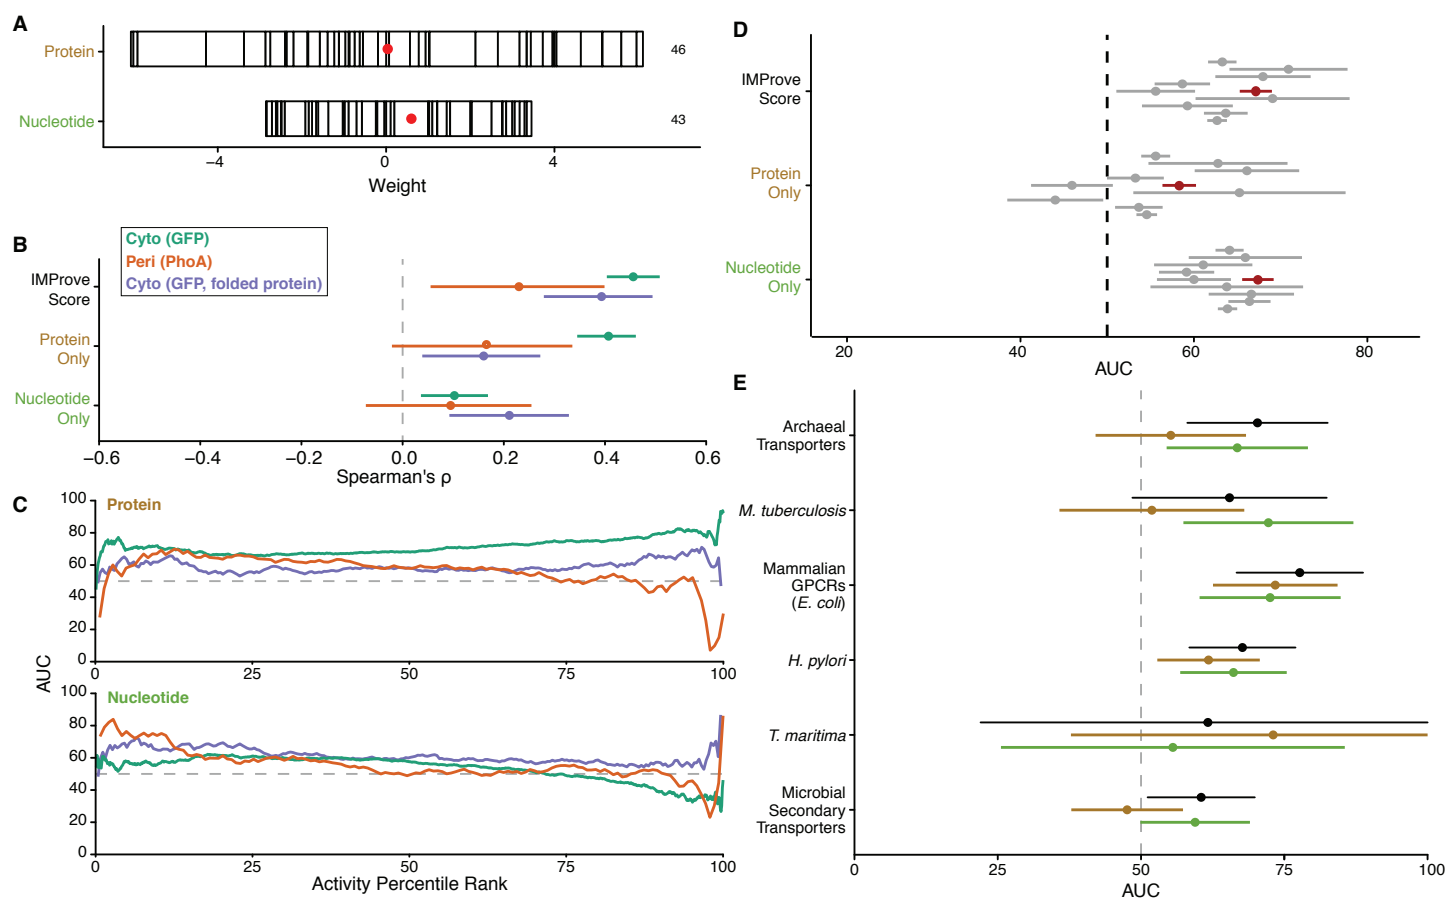

907 **Fig. 4. Feature contributions to the model.** (A) Classifying features by the type of sequence they are  
908 calculated from. (B) Considering the training set (as in Fig. 1), Spearman correlation coefficients with  
909 95% confidence intervals using individual feature categories for each grouping of data within the  
910 training set of *E. coli* IMPs. Colors indicate the subset being assessed (green, whole cell GFP  
911 fluorescence; orange, alkaline phosphatase activity; purple, folded protein by in-gel fluorescence). (C)  
912 Protein/nucleotide feature dependence within the training set substantiated by the AUC of the ROC at  
913 every possible activity threshold for feature subsets independently (as in Fig. 1E). (D) The AUC and  
914 95% confidence intervals using only protein or nucleotide features. (E) Protein/nucleotide feature  
915 dependence across small scale datasets shown as AUCs of the ROC along with 95% CI for the condition  
916 with the best overall predictive power (black).

Fig. 5

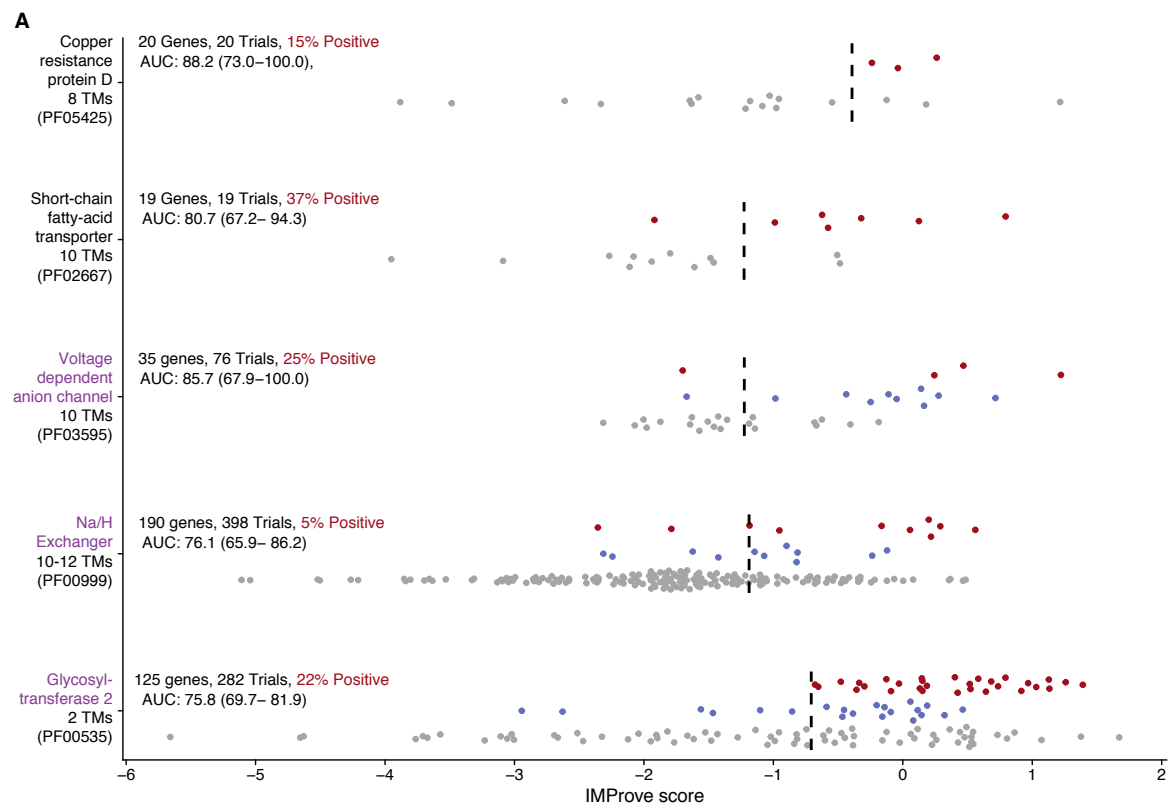

**B**

|                                               | Pfam    | TMs | Number Genes/Trials | Positive | AUC (95% CI)     | Proportion of positives at 50% |
|-----------------------------------------------|---------|-----|---------------------|----------|------------------|--------------------------------|
| DUF962                                        | PF06127 | 2   | 11                  | 54.5     | 93.3 (77.9–100)  | 83.3                           |
| DUF412                                        | PF04217 | 2   | 12                  | 41.7     | 88.6 (65.5–100)  | 100.0                          |
| DUF1282                                       | PF06930 | 5   | 12                  | 41.7     | 82.9 (57.2–100)  | 80.0                           |
| Sulfate exporter                              | PF03601 | 10  | 52                  | 17.3     | 78.3 (64.3–92.3) | 88.9                           |
| Fluoride Channel                              | PF02537 | 4   | 81                  | 24.7     | 77.0 (66.2–87.8) | 80.0                           |
| Acetyltransferase 3                           | PF01757 | 10  | 19/23               | 26.1     | 76.5 (52.9–100)  | 83.3                           |
| PTS-EIIC                                      | PF02378 | 8   | 82                  | 18.3     | 76.2 (62.1–90.4) | 80.0                           |
| Na <sup>+</sup> /P <sup>i</sup> cotransporter | PF02690 | 8   | 29/64               | 14.1     | 74.6 (54.4–94.9) | 77.8                           |
| ABC transp. Family 3                          | PF00950 | 7   | 31/33               | 21.2     | 72.5 (51.0–94.1) | 71.4                           |
| Biotin transporter                            | PF02632 | 5   | 47                  | 31.9     | 70.8 (53.8–87.9) | 66.7                           |

**C**

|      | Relative Expression Level | Prediction |          |
|------|---------------------------|------------|----------|
|      |                           | IMProve    | SD Sites |
| BrnQ | 0.30                      | 0.35       | 0.18     |
| YbjJ | -0.07                     | 0.05       | 0.18     |
| YgdD | -0.26                     | -1         | 0.35     |

918 **Fig. 5. Usage of the model within IMP families and for optimization of expression. (A)** Outcomes  
919 for specific protein families with an optimal IMProve score threshold indicated. Genes are shown in the  
920 chart as dots colored based on outcomes from trials: Only Positive (red), Only Negative (grey), and  
921 Mixed (blue). Overall statistics, as in Supplementary Table 3, are noted. Dashed lines represent the  
922 optimal threshold from the ROC curves. For the top two rows, each was only tested in a single condition  
923 (N: His-FLAG-TEV-gene). The bottom three rows are larger pools from NYCOMPS where there are  
924 multiple trials for many of the genes. **(B)** A table curated from Supplementary Table 3 where Pfams  
925 were selected based on specific criteria (minimum 10 trials, 4 positive and 4 negative outcomes) and  
926 ordered by AUC. Proteins, as in A, that have known crystal structures within the family are highlighted  
927 in purple. DUFs are domains of unknown function. For context, the following Pfam families correspond  
928 to TCDB classes: PF05425, [9.B.62](#); PF02667, [2.A.73](#); PF03595, [2.A.16](#); PF00999, [2.A.36](#), [2.A.37](#);  
929 PF00535, [9.B.32](#); PF03601, [2.A.98](#); PF02537, [1.A.43](#); PF01757, [9.B.97](#); PF02378, [4.A.1](#), [4.A.2](#), [4.A.3](#);  
930 PF02690, [2.A.58](#); PF02632, [2.A.88](#)<sup>107</sup>. **(C)** A comparison of the predictive capacity of IMProve  
931 compared to using silent mutations engineered to increase anti-SD sequence binding propensity<sup>26</sup>. The  
932 table presents experimental relative expression level (mutant over wild-type sequence) versus  
933 predictions from relative changes in either IMProve score or SD-like sites. The cells are colored as a  
934 heat map from red (lower expression) to blue (higher expression).

## 1 **Supplementary Material**



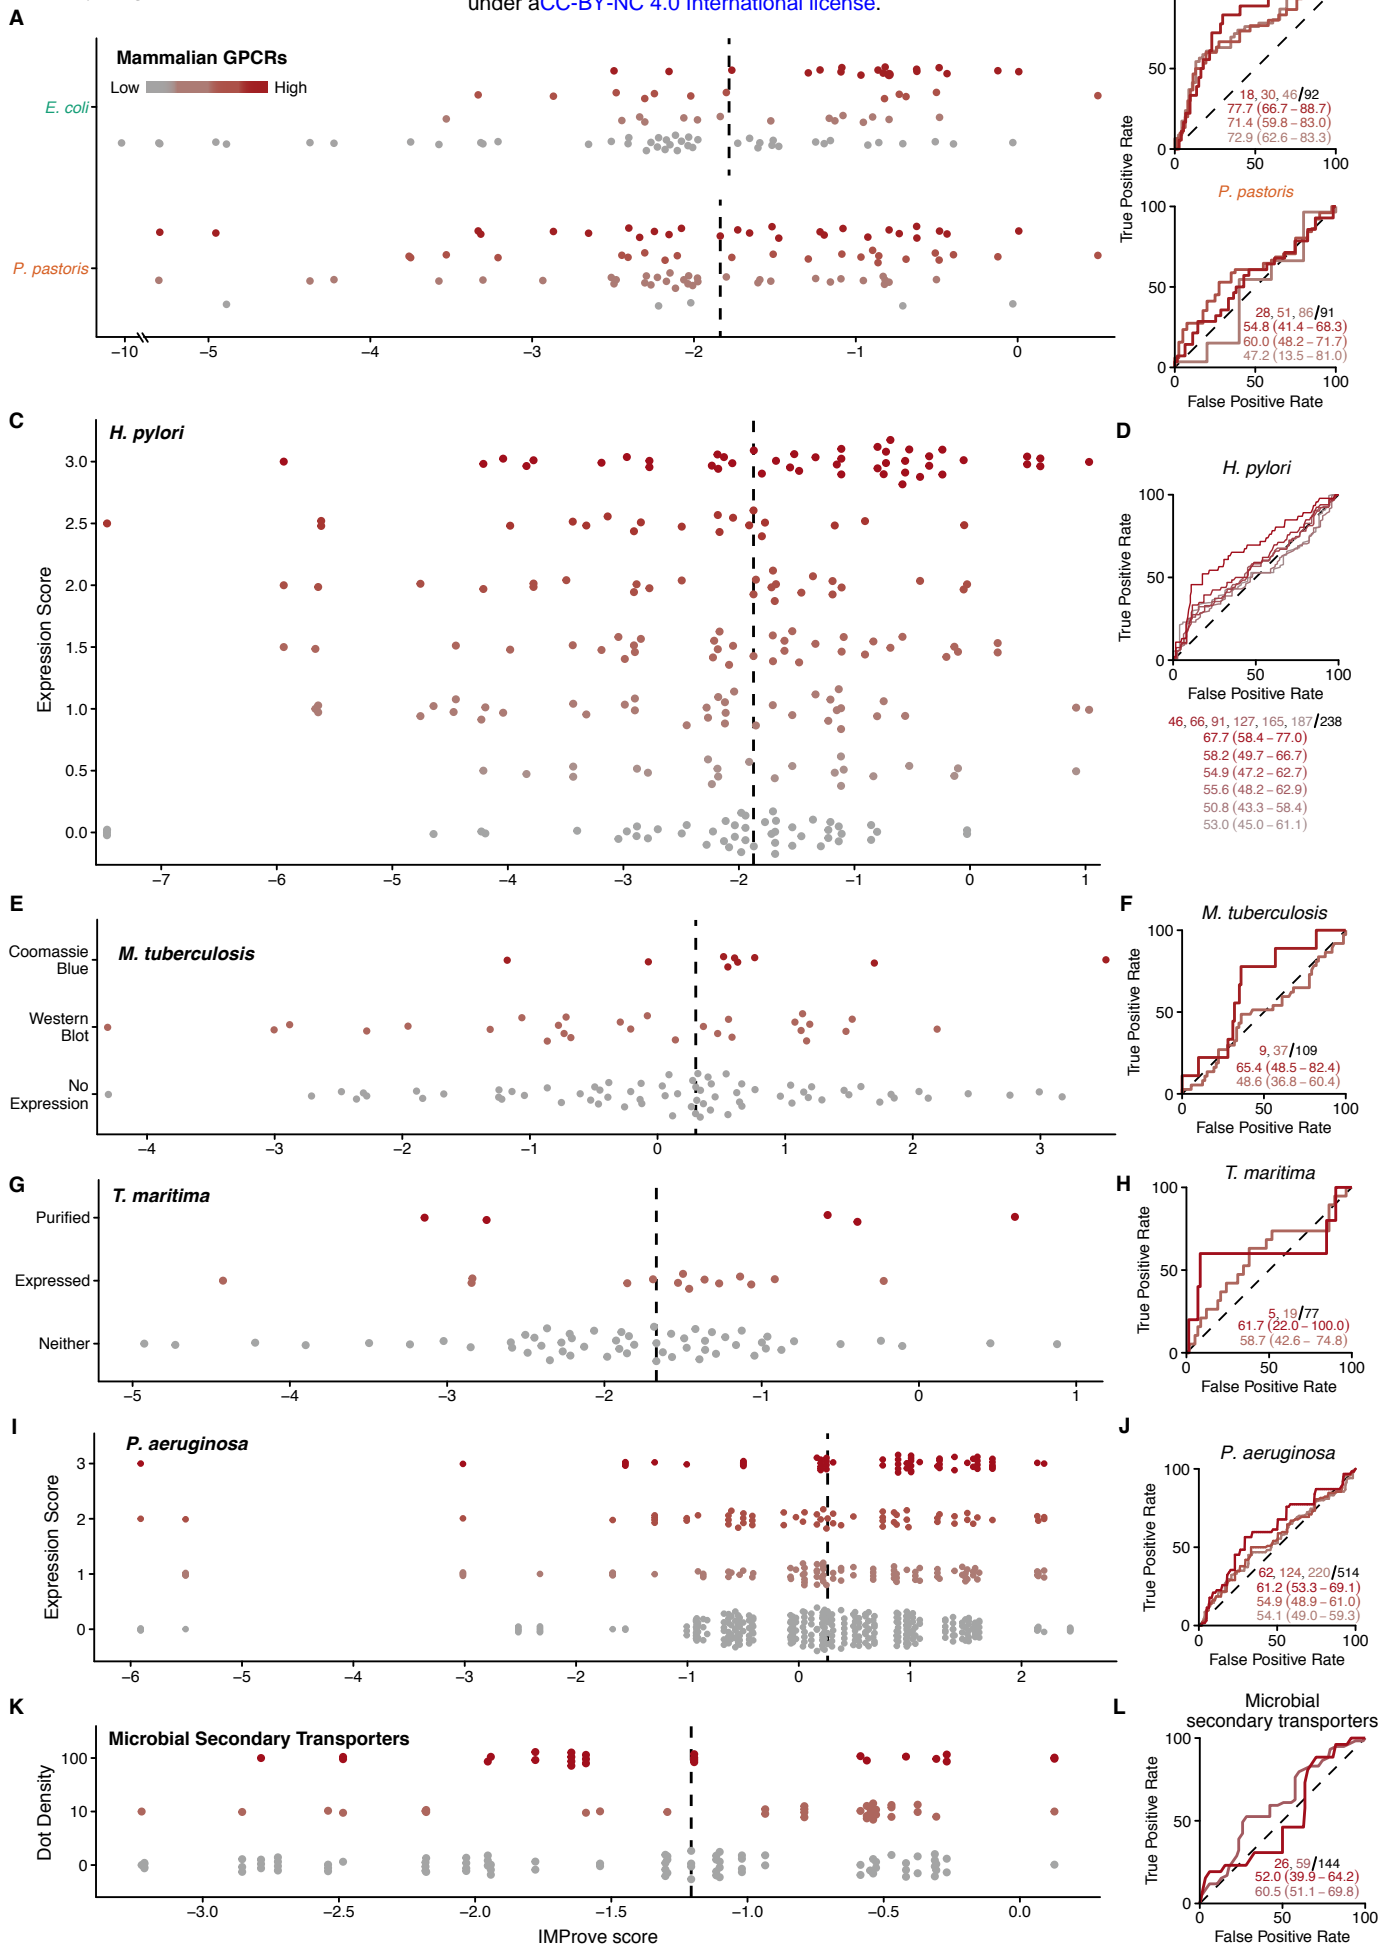

3 **Supplementary Fig. 1. Success of the model against a variety of small scale outcomes.** For each set,  
4 vertical lines indicate the median IMProve score. Receiver Operating Characteristics (ROC) along with  
5 Areas Under the Curves (AUC) and 95% confidence interval as well as the total number of positives for  
6 the given threshold (red hues) along with the total outcomes (black) are presented. In each curve,  
7 increasing expression thresholds as defined by the original publication are displayed as deeper red. The  
8 Receiver Operating Characteristic (ROC) with each cutoff is plotted, where a higher cutoff is represented  
9 by a deeper red, followed by the Area Under the Curves (directly below) in colors that correspond to the  
10 respective curve. **(A,B)** Mammalian GPCR expression in either *E. coli* (top) or *P. pastoris* (bottom). **(C,D)**  
11 Experimental expression of 116 *H. pylori* membrane proteins in *E. coli* in at most 3 vectors (238 trials)  
12 scored as either a 1, 2, or 3 from the outcome of a dot blot as well as Coomassie Staining of an SDS-  
13 PAGE gel for two of the vectors. To compare the three vectors with a single set of scores, the two scores  
14 were averaged to give a single number for a condition making them comparable to the third vector while  
15 yielding 2 additional thresholds (1.5 and 2.5) and the 6 total levels shown. **(E,F)** Experimental expression  
16 of *M. tuberculosis* membrane proteins plotted based on outcomes. **(G,H)** Pooled outcomes from the  
17 expression of 87 *P. aeruginosa* membrane proteins in *E. coli* across 3 plasmids and 2 strains scored on a  
18 relative scale. **(I,J)** Expression of 77 *T. maritima* membrane proteins in *E. coli* noted as purified (5), not  
19 purified but expressed (14), or neither. **(K,L)** Expression of 37 microbial secondary transporters in 4  
20 IPTG-inducible vectors (144 trials) in *E. coli* quantified as 10 ng/mL (pink) or 100 ng/mL (red) via dot  
21 blot.



23 **Supplementary Fig. 2. Complete set of feature correlations and their individual contributions to the**  
24 **model.** Features are ordered first by category and then by weight (grey bars). Labels are green for protein-  
25 sequence derived and brown for nucleotide-sequence derived features. Pearson correlation coefficient  
26 between each pair of features across the NYCOMPS dataset is plotted (right). See S1 Table for a detailed  
27 description of each feature. Feature categories are overlaid as square boxes and indicated by black bars on  
28 the top, left, and right of the correlation matrix.

### Supplementary Fig. 3

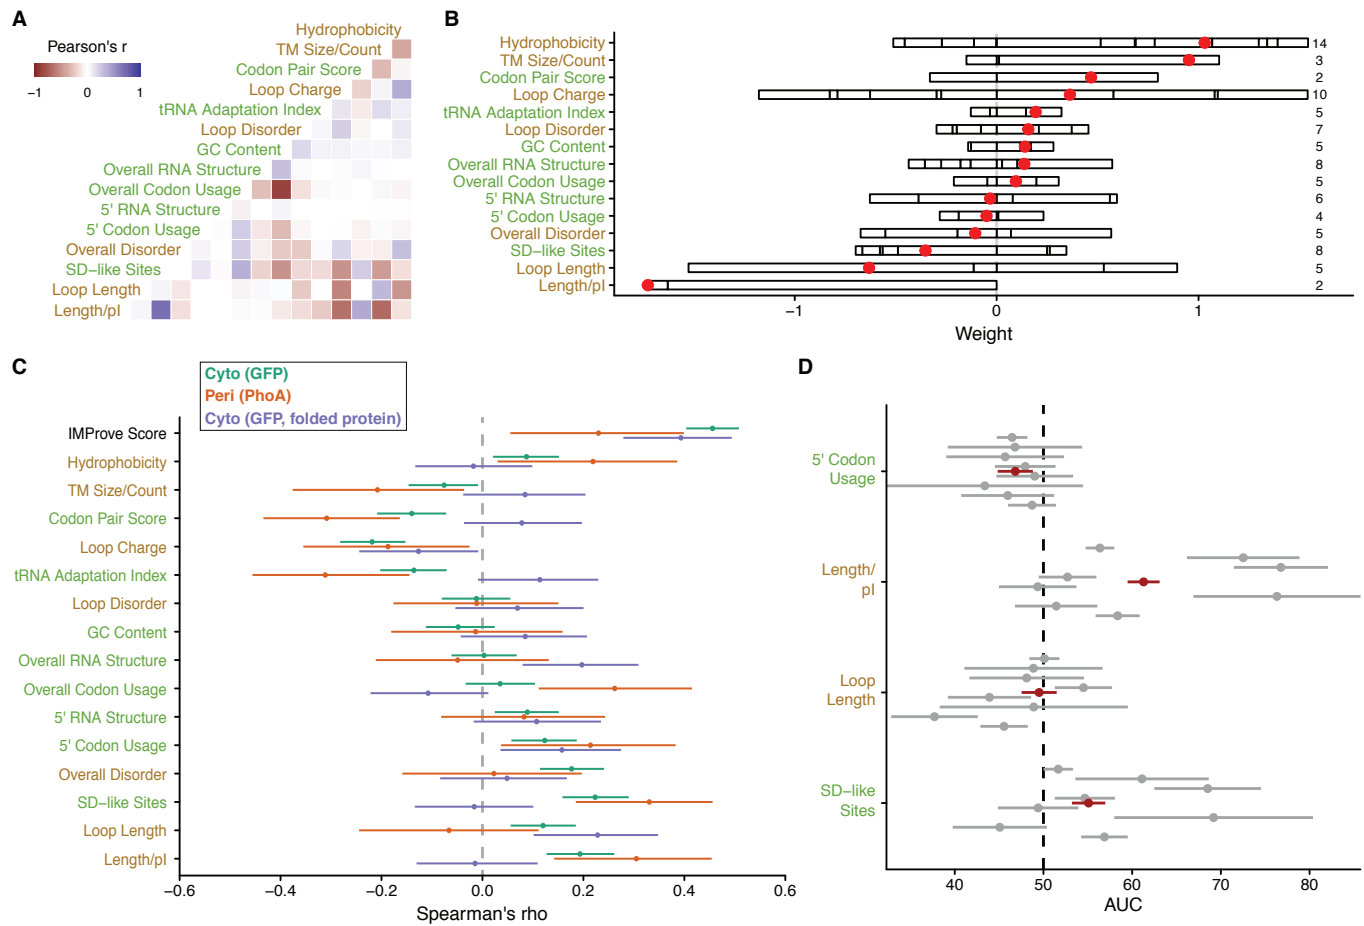

30 **Supplementary Fig. 3. Feature contributions to the model across datasets used for training and**  
31 **validation. (A)** Pearson correlation coefficients between feature categories are shown. Feature labels are  
32 green for protein-sequence derived and brown for nucleotide-sequence derived. **(B)** Total weight for each  
33 category is represented as a bar. The contribution of each feature to the category is shown by partitioning  
34 the bar. The red dot indicates the total sum of weights within the category. **(C)** Feature category  
35 dependence within the training set is shown by Spearman's  $\rho$  and 95% CI between the normalized  
36 outcomes versus the feature subset. **(D)** Considering the NYCOMPS data set (as in Fig 2), the Area Under  
37 the Curve (AUC) of a Receiver Operating Characteristic and 95% confidence interval when predicting  
38 solely by features from the specified category against the NYCOMPS dataset. Red, using positive only as  
39 the cut-off for individual genes (Fig 2C); grey, using positive outcomes within each plasmid and  
40 solubilization condition (as in Fig 2E).



Supplementary Table 1

| Type                   | Category                                         | Calculation Method/Tools        | Abbreviation                                                                              | Description                                                                                                                                                    | Used for Model      | SVM Weight  | Index by Weight |    |
|------------------------|--------------------------------------------------|---------------------------------|-------------------------------------------------------------------------------------------|----------------------------------------------------------------------------------------------------------------------------------------------------------------|---------------------|-------------|-----------------|----|
| Nucleotide             | Overall Codon usage                              | codonW 1.4.2                    | <i>CAI</i>                                                                                | Codon Adaptation Index                                                                                                                                         | T                   | 0.10882621  | 25              |    |
|                        |                                                  |                                 | <i>Nc</i>                                                                                 | Effective number of codons                                                                                                                                     | F                   | 0.088591106 | 26              |    |
|                        |                                                  |                                 | <i>GC3s</i>                                                                               | GC content at the synonymous position                                                                                                                          | T                   | -0.04667477 | 51              |    |
|                        |                                                  |                                 | <i>CpG</i>                                                                                | Frequency of CG di-nucleotides                                                                                                                                 | T                   | -0.16528028 | 72              |    |
|                        | Codon Pair Score                                 | Code from Coleman, et al., 2008 | Biopython                                                                                 | <i>avgCU</i>                                                                                                                                                   | Average Codon Usage | T           | 0.11009531      | 21 |
|                        |                                                  |                                 | <i>CPS</i>                                                                                | Sum of Codon Pair Score values                                                                                                                                 | T                   | 0.79854816  | 2               |    |
|                        |                                                  |                                 | <i>CPSpL</i>                                                                              | Codon Pair Bias                                                                                                                                                | T                   | -0.33074614 | 77              |    |
|                        | tRNA adaptation index                            | codonR                          | <i>tAI</i>                                                                                | tRNA Adaptation Index                                                                                                                                          | T                   | -0.03330641 | 47              |    |
|                        |                                                  |                                 | <i>tAI10Min</i>                                                                           | Minimum tAI score over 10 codon windows                                                                                                                        | T                   | -0.09449133 | 58              |    |
|                        |                                                  |                                 | <i>tAI10Max</i>                                                                           | Maximum tAI score over 10 codon windows                                                                                                                        | T                   | 0.14543056  | 19              |    |
|                        |                                                  |                                 | <i>tAI10q25</i>                                                                           | 25 <sup>th</sup> percentile of tAI scores over 10 codon windows                                                                                                | T                   | 0.057585392 | 29              |    |
|                        |                                                  |                                 | <i>tAI10q75</i>                                                                           | 75 <sup>th</sup> percentile of tAI scores over 10 codon windows                                                                                                | T                   | 0.11830714  | 19              |    |
|                        | 5' Codon Usage                                   | Biopython                       | <i>avgCU_first40</i>                                                                      | Codon Usage over the first 40 codons                                                                                                                           | T                   | 0.008758551 | 35              |    |
|                        |                                                  |                                 | <i>avgCU_first20</i>                                                                      | Codon Usage over the first 20 codons                                                                                                                           | T                   | -0.18854903 | 65              |    |
|                        |                                                  |                                 | <i>avgCU_first5</i>                                                                       | Codon Usage over the first 5 codons                                                                                                                            | T                   | -0.09333684 | 52              |    |
|                        |                                                  |                                 | <i>avgCU_first10</i>                                                                      | Codon Usage over the first 10 codons                                                                                                                           | T                   | 0.22332223  | 14              |    |
|                        | GC content                                       | Custom                          | <i>GC</i>                                                                                 | Overall GC content                                                                                                                                             | T                   | 0.11720225  | 18              |    |
|                        |                                                  |                                 | <i>GC10min</i>                                                                            | Minimum %GC over 10 codon windows                                                                                                                              | T                   | -0.12703171 | 56              |    |
|                        |                                                  |                                 | <i>GC10q25</i>                                                                            | 25 <sup>th</sup> percentile of %GC over 10 codon windows                                                                                                       | T                   | 0.052650452 | 25              |    |
|                        |                                                  |                                 | <i>GC10q75</i>                                                                            | 75 <sup>th</sup> percentile of %GC over 10 codon windows                                                                                                       | T                   | 0.11153498  | 18              |    |
|                        | 5' RNA Structure                                 | RNAfold 2.1.9                   | <i>X40deltaG</i>                                                                          | $\Delta G$ of the lowest free energy structure for the first 40 codons                                                                                         | T                   | 0.075478621 | 22              |    |
|                        |                                                  |                                 | <i>X40freqens</i>                                                                         | Frequency of the lowest free energy structure within the ensemble for the first 40 codons                                                                      | T                   | -0.12966549 | 51              |    |
|                        |                                                  | NUPACK                          | <i>plus10valRNAss</i>                                                                     | Average hybridization probability centered around +10 base, <i>i.e.</i> average of +5 to +15 (Goodman, et al., 2013)                                           | T                   | 0.080081761 | 21              |    |
|                        |                                                  |                                 | <i>zeroto38avgRNAss</i>                                                                   | Average hybridization probability over 10 base windows from 0 to +38                                                                                           | T                   | 0.48096541  | 7               |    |
|                        |                                                  |                                 | <i>zeroto38minRNAss</i>                                                                   | Minimum hybridization probability over 10 base windows from 0 to +38                                                                                           | T                   | -0.0451249  | 34              |    |
|                        |                                                  |                                 | <i>zeroto38q25RNAss</i>                                                                   | 25 <sup>th</sup> percentile of hybridization probability over 10 base windows from 0 to +38                                                                    | T                   | -0.34232038 | 56              |    |
|                        |                                                  |                                 | <i>zeroto38q75RNAss</i>                                                                   | 75 <sup>th</sup> percentile of hybridization probability over 10 base windows from 0 to +38                                                                    | T                   | -0.24050736 | 53              |    |
|                        |                                                  |                                 | <i>zeroto38maxRNAss</i>                                                                   | Maximum hybridization probability over 10 base windows from 0 to +38                                                                                           | T                   | 0.034986421 | 23              |    |
|                        | Overall RNA structure                            | RNAfold 2.1.9                   | <i>deltaG</i>                                                                             | $\Delta G$ of the lowest free energy structure                                                                                                                 | F                   | #N/A        | #N/A            |    |
|                        |                                                  |                                 | <i>freqens</i>                                                                            | Frequency of the lowest free energy structure within the ensemble                                                                                              | T                   | 0.027135454 | 27              |    |
|                        |                                                  | NUPACK                          | <i>avgRNAss</i>                                                                           | Average hybridization probability over 10 base windows                                                                                                         | T                   | 0.46994936  | 7               |    |
|                        |                                                  |                                 | <i>minRNAss</i>                                                                           | Minimum hybridization probability over 10 base windows                                                                                                         | T                   | -0.0498676  | 32              |    |
|                        |                                                  |                                 | <i>q25RNAss</i>                                                                           | 25 <sup>th</sup> percentile of hybridization probability over 10 base windows                                                                                  | T                   | -0.09537871 | 39              |    |
|                        |                                                  |                                 | <i>q75RNAss</i>                                                                           | 75 <sup>th</sup> percentile of hybridization probability over 10 base windows                                                                                  | T                   | -0.08084998 | 37              |    |
|                        |                                                  |                                 | <i>maxRNAss</i>                                                                           | Maximum hybridization probability over 10 base windows                                                                                                         | T                   | -0.07990561 | 36              |    |
|                        | Shine-Dalgarno-like sites (Fluman, et al., 2014) | RNAfold 2.1.9                   | <i>totalSDsites</i>                                                                       | Total number of Shine-Dalgarno (SD)-like sites                                                                                                                 | T                   | -0.48917305 | 51              |    |
|                        |                                                  |                                 | <i>relareaSD</i>                                                                          | Average anti-SD - SD hybridization energy for the whole protein                                                                                                | T                   | -0.07600968 | 33              |    |
|                        |                                                  |                                 | <i>codon16_36SD</i>                                                                       | Total number of SD-like sites between codons 16 and 36                                                                                                         | T                   | -0.01342936 | 27              |    |
|                        |                                                  |                                 | <i>codon16_36relareaSD</i>                                                                | Average anti-SD - SD hybridization energy between codons 16 and 36                                                                                             | T                   | 0.25027758  | 10              |    |
|                        |                                                  |                                 | <i>codon40_60SD</i>                                                                       | Total number of SD-like sites between codons 40 and 60                                                                                                         | T                   | 0.013446409 | 22              |    |
|                        |                                                  |                                 | <i>codon40_60relareaSD</i>                                                                | Average anti-SD - SD hybridization energy between codons 40 and 60                                                                                             | T                   | 0.082086273 | 17              |    |
|                        |                                                  |                                 | <i>-5 +2TM2SD</i>                                                                         | Total number of SD-like sites lying in the region starting 5 residues before and ending 2 residues after the start of the 2 <sup>nd</sup> transmembrane domain | T                   | -0.08689712 | 31              |    |
|                        | Overall Disorder                                 | DisEMBL 1.4                     | <i>hotloops</i>                                                                           | Number of "hot" loops, which are classified as "highly" dynamic based on $C_u$ temperature, minus 1                                                            | T                   | 0.071120471 | 17              |    |
|                        |                                                  |                                 | <i>avgRONNTM</i>                                                                          | Average RONN score for TMs                                                                                                                                     | T                   | -0.12197997 | 27              |    |
|                        |                                                  |                                 | <i>avgRONN</i>                                                                            | Average RONN score for the entire protein                                                                                                                      | T                   | 0.49654859  | 6               |    |
|                        |                                                  |                                 | <i>q25RONN</i>                                                                            | 25 <sup>th</sup> percentile of RONN scores                                                                                                                     | T                   | -0.19440715 | 37              |    |
|                        |                                                  |                                 | <i>q75RONN</i>                                                                            | 75 <sup>th</sup> percentile of RONN scores                                                                                                                     | T                   | -0.35734981 | 40              |    |
| <i>avgRONNloop</i>     |                                                  |                                 | Average RONN score of loops                                                               | T                                                                                                                                                              | -0.0781056          | 26          |                 |    |
| <i>avgRONNnextloop</i> |                                                  |                                 | Average RONN score of extracellular loops                                                 | T                                                                                                                                                              | 0.20923467          | 10          |                 |    |
| <i>avgRONNcytloop</i>  |                                                  |                                 | Average RONN score of cytoplasmic loops                                                   | T                                                                                                                                                              | 0.16293134          | 11          |                 |    |
| <i>avgRONNNterm</i>    |                                                  |                                 | Average RONN score of the N-terminus, <i>i.e.</i> loop that precedes the first TM segment | F                                                                                                                                                              | -0.11986996         | 28          |                 |    |
| <i>avgRONNCterm</i>    |                                                  |                                 | Average RONN score of the C-terminus, <i>i.e.</i> loop that follows the final TM segment  | T                                                                                                                                                              | 0.082627214         | 13          |                 |    |
| Loop Disorder          | RONN 3.1                                         | <i>avgRONNTM1_2</i>             | Average RONN score for the loop between the first 2 TM segments                           | T                                                                                                                                                              | -0.02097784         | 19          |                 |    |

|           |                       |                        |                                                              |                                                                               |                                                           |             |             |    |
|-----------|-----------------------|------------------------|--------------------------------------------------------------|-------------------------------------------------------------------------------|-----------------------------------------------------------|-------------|-------------|----|
| Protein   | TM Size/Count         | Phobius/Biopython      | <i>RONNlongestloop</i>                                       | Average RONN score for the longest loop                                       | T                                                         | -0.07889783 | 22          |    |
|           |                       |                        | <i>avgTMlen</i>                                              | Average length of TM segments                                                 | T                                                         | 0.012067568 | 16          |    |
|           |                       |                        | <i>membrCont</i>                                             | Number of residues predicted to be part of a TM segment                       | T                                                         | 1.0901064   | 1           |    |
|           |                       |                        | <i>membrContNorm</i>                                         | MembrCont / length of protein                                                 | T                                                         | -0.1495994  | 23          |    |
|           | Hydrophobicity        | Custom                 | <i>avgHydroGES</i>                                           | Average hydrophobicity (GES scale as in Daley, et al., 2005)                  | T                                                         | 0.51562566  | 2           |    |
|           |                       |                        | <i>minhyd_19GES</i>                                          | Minimum hydrophobicity over 19 residue windows                                | T                                                         | 0.16866946  | 7           |    |
|           |                       |                        | <i>minhyd_41GES</i>                                          | Minimum hydrophobicity over 41 residue windows                                | T                                                         | 0.004997028 | 12          |    |
|           |                       |                        | <i>maxhyd_41GES</i>                                          | Minimum hydrophobicity over 41 residue windows                                | T                                                         | -0.00273499 | 12          |    |
|           |                       |                        | <i>nterm_hydOCT</i>                                          | Average hydrophobicity of the N-terminus                                      | T                                                         | 0.052106239 | 9           |    |
|           |                       |                        | <i>loop1_avghydOCT</i>                                       | Average hydrophobicity of the first loop (Octanol-water partitioning scale)   | T                                                         | -0.10978091 | 15          |    |
|           |                       |                        | <i>loop1_minhyd_OCT19</i>                                    | Minimum hydrophobicity of 19 residue windows                                  | T                                                         | 0.094023138 | 8           |    |
|           |                       |                        | <i>loop1_maxhyd_OCT19</i>                                    | Maximum hydrophobicity of 19 residue windows                                  | T                                                         | 0.2844961   | 5           |    |
|           |                       |                        | <i>HYD1stTM</i>                                              | Hydrophobicity of the first TM segment                                        | T                                                         | -0.15915927 | 14          |    |
|           |                       |                        | <i>HYDallTMs</i>                                             | Average hydrophobicity of all TM segments                                     | T                                                         | 0.23088375  | 5           |    |
|           |                       |                        | T. Hessa, et al., 2007                                       | <i>delG1stTM</i>                                                              | $\Delta$ G of insertion of the 1 <sup>st</sup> TM segment | T           | 0.041452195 | 6  |
|           |                       |                        |                                                              | <i>delGallTMs</i>                                                             | Average $\Delta$ G of insertion of all TM segments        | T           | -0.18423484 | 13 |
|           | Biopython (ProtParam) | <i>aromaticityNorm</i> | Average aromaticity                                          | T                                                                             | 0.15027378                                                | 1           |             |    |
|           |                       | <i>GPcount</i>         | Total number of glycines and prolines in TMs / number of TMs | T                                                                             | -0.05606809                                               | 1           |             |    |
|           | Loop charge           | Phobius/Custom         | <i>numPosCyt</i>                                             | Total (-) charges (R, K, H) on cytoplasmic loops                              | T                                                         | -0.27489546 | 13          |    |
|           |                       |                        | <i>numPosNormCyt</i>                                         | numPosCyt / the total cytoplasmic loop length                                 | T                                                         | -0.02318138 | 7           |    |
|           |                       |                        | <i>numNegCyt</i>                                             | Total (+) charges (E, D) on cytoplasmic loops                                 | T                                                         | 0.57904214  | 1           |    |
|           |                       |                        | <i>numNegNormCyt</i>                                         | numNegCyt / the total cytoplasmic loop length                                 | T                                                         | -0.32880098 | 11          |    |
|           |                       |                        | <i>numPosExt</i>                                             | Total (+) charges (R, K, H) on extracellular loops                            | T                                                         | 0.50109029  | 1           |    |
|           |                       |                        | <i>numPosNormExt</i>                                         | numPosExt / divided by the total extracellular loop length                    | T                                                         | -0.16209885 | 9           |    |
|           |                       |                        | <i>numNegExt</i>                                             | Total (-) charges (E, D) on extracellular loops                               | T                                                         | 0.015456084 | 4           |    |
|           |                       |                        | <i>numNegNormExt</i>                                         | numNegExt / the total extracellular loop length                               | T                                                         | -0.03816556 | 4           |    |
|           |                       |                        | <i>numPos_LongestCytLoop</i>                                 | Total (+) charges (R, K, H) on the longest cytoplasmic loop                   | T                                                         | 0.44503307  | 1           |    |
|           |                       |                        | <i>nterm_neg</i>                                             | Total (-) charges (E, D) on the N-terminus                                    | T                                                         | -0.35054731 | 6           |    |
|           | Loop length           | Phobius/Custom         | <i>len1_2loop</i>                                            | Length of the loop between the first two TM segments (Fluman, et al., 2014)   | T                                                         | -0.11428721 | 5           |    |
|           |                       |                        | <i>longestCytLoopNorm</i>                                    | Length of the longest cytoplasmic loop divided by the length of the protein   | T                                                         | -0.50917369 | 5           |    |
|           |                       |                        | <i>longestExtLoop</i>                                        | Length of the longest extracellular loop                                      | T                                                         | 0.36319321  | 1           |    |
|           |                       |                        | <i>longestExtLoopNorm</i>                                    | Length of the longest extracellular loop divided by the length of the protein | T                                                         | -0.90276045 | 4           |    |
| Length/pI | Biopython (ProtParam) | <i>lenNterm</i>        | Length of N-terminus                                         | F                                                                             | #N/A                                                      | #N/A        |             |    |
|           |                       | <i>lenNtermNorm</i>    | LenNterm / length of protein                                 | T                                                                             | 0.53105849                                                | 2           |             |    |
|           |                       | <i>seqLen</i>          | Protein length, i.e. number of residues                      | T                                                                             | -1.62956                                                  | 4           |             |    |
|           |                       | <i>weight</i>          | Molecular weight                                             | F                                                                             | #N/A                                                      | #N/A        |             |    |
|           |                       | <i>pI</i>              | Isoelectric point                                            | T                                                                             | -0.09808014                                               | 3           |             |    |

43 **Supplementary Table 1. Sequence parameter weights and descriptions.** Weights are presented after  
44 normalizing to the mean value for clarity. Features that were calculated but removed in pre-processing are  
45 noted (Methods 3).

## Supplementary Table 2

| Gene Structure | Solubilization Detergent            | NYCOMPS Abbreviation | Count | Positive Count | All  |                    |                    | C-terminal Cytoplasmic (Predicted) |      |      |                    |                    |
|----------------|-------------------------------------|----------------------|-------|----------------|------|--------------------|--------------------|------------------------------------|------|------|--------------------|--------------------|
|                |                                     |                      |       |                | AUC  | Lower bound 95% CI | Upper bound 95% CI | C-terminal Periplasmic (Predicted) |      | AUC  | Lower bound 95% CI | Upper bound 95% CI |
|                |                                     |                      |       |                |      |                    | Count              | Positive Count                     |      |      |                    |                    |
|                | Gene Outcomes (Only positive)       |                      | 8444  | 934            | 67.1 | 65.2               | 68.9               | 5680                               | 693  | 66.3 | 64.2               | 68.5               |
|                | Gene Outcomes (At least 1 positive) |                      |       | 2097           | 59.7 | 58.3               | 61.1               | 2764                               | 241  | 67.6 | 64.0               | 71.2               |
|                | All Expression Trials               |                      | 17114 | 2686           | 62.6 | 61.5               | 63.8               | 5680                               | 1528 | 58.9 | 57.3               | 60.6               |
|                |                                     |                      |       |                |      |                    |                    | 2764                               | 569  | 59.9 | 57.3               | 62.6               |
|                |                                     |                      |       |                |      |                    |                    | 11435                              | 1966 | 62.1 | 60.8               | 63.5               |
|                |                                     |                      |       |                |      |                    |                    | 5679                               | 720  | 62.7 | 60.5               | 64.8               |
| His-FLAG-TEV-  | DDM                                 | N                    | 7730  | 1344           | 63.2 | 61.6               | 64.8               | 5072                               | 991  | 62.2 | 60.2               | 64.1               |
|                |                                     |                      |       |                |      |                    |                    | 2658                               | 353  | 63.9 | 60.8               | 67.1               |
| -TEV-His       | DDM                                 | C                    | 3409  | 524            | 63.6 | 61.1               | 66.1               | 2534                               | 405  | 64.5 | 61.6               | 67.3               |
|                |                                     |                      |       |                |      |                    |                    | 875                                | 119  | 60.3 | 54.9               | 65.6               |
| -TEV-His       | LDAO                                | C_LDAO               | 763   | 128            | 59.2 | 54.0               | 64.4               | 532                                | 99   | 58.7 | 52.5               | 64.8               |
|                |                                     |                      |       |                |      |                    |                    | 231                                | 29   | 59.3 | 49.3               | 69.3               |
| His-GST-TEV-   | DDM                                 | MSGC.24              | 383   | 31             | 69.0 | 60.1               | 77.8               | 226                                | 21   | 67.2 | 55.3               | 79.0               |
|                |                                     |                      |       |                |      |                    |                    | 157                                | 10   | 72.2 | 59.8               | 84.6               |
| -TEV-His       | DDM                                 | MSGC.28              | 1810  | 178            | 55.6 | 51.1               | 60.1               | 1117                               | 129  | 55.4 | 50.0               | 60.8               |
|                |                                     |                      |       |                |      |                    |                    | 693                                | 49   | 54.0 | 45.5               | 62.5               |
| His-TEV-       | DDM                                 | MSGC.7               | 2125  | 316            | 58.6 | 55.4               | 61.8               | 1381                               | 216  | 58.5 | 54.6               | 62.3               |
|                |                                     |                      |       |                |      |                    |                    | 744                                | 100  | 58.6 | 52.9               | 64.2               |
| His-MBP-TEV-   | DDM                                 | MSGC.9               | 511   | 93             | 67.9 | 62.4               | 73.4               | 347                                | 61   | 64.4 | 57.5               | 71.3               |
|                |                                     |                      |       |                |      |                    |                    | 164                                | 32   | 74.9 | 66.4               | 83.3               |
| His-MBP-TEV-   | LDAO                                | MSGC.9_LDAO          | 383   | 72             | 70.8 | 64.0               | 77.6               | 226                                | 44   | 65.2 | 55.9               | 74.4               |
|                |                                     |                      |       |                |      |                    |                    | 157                                | 28   | 79.1 | 69.8               | 88.4               |

47 **Supplementary Table 2. AUC values for the NYCOMPS dataset.** AUC values and 95% confidence  
48 intervals are presented in summary, by expression condition, and by predicted C-terminal localization as  
49 well as for IMProve scores calculated without the most computationally expensive RNA secondary  
50 structure calculation.

51 **Supplementary Table 3. Predictive performances of the model across protein families.** The proteins  
52 and performances are with respect to those tested by NYCOMPS as summarized in Fig 2. This data is  
53 available in an interactive format at [clemonslab.caltech.edu](http://clemonslab.caltech.edu).
